# Supplementary material
Source: PubMed Central journal article supplement (PMC4068539)
Supplement: AAC.02600-14_zac007143065so1.pdf [file AAC.02600-14_zac007143065so1.pdf]

1 Supplementary Material

2 **New insights into the bacterial RNA polymerase inhibitor CBR703 as a**  
3 **starting point for optimization as an anti-infective agent**

4 **Weixing Zhu,<sup>[a]</sup> Jörg Haupenthal,<sup>[a]</sup> Matthias Groh,<sup>[a]</sup> Michelle Fountain<sup>[c]</sup> and Rolf W.**  
5 **Hartmann<sup>\*[a, b]</sup>**

6 <sup>[a]</sup> Helmholtz Institute for Pharmaceutical Research Saarland (HIPS), Department of Drug Design  
7 and Optimization and <sup>[b]</sup> Pharmaceutical and Medicinal Chemistry, Saarland University, Campus  
8 C2\_3, D-66123 Saarbrücken, Germany. <sup>[c]</sup> Helmholtz Centre for Infection Research,  
9 Inhoffenstraße 7, Braunschweig 38124, Germany.  
10

11 **Experimental Section**

12 **Chemistry.**

13 Commercial reagents were purchased and used without further purification. If the acyl chloride  
14 was not available it was obtained from the carboxylic acid by refluxing in SOCl<sub>2</sub> for 4 h and  
15 removal of the volatiles. Proton nuclear magnetic resonance (<sup>1</sup>H NMR) and carbon NMR (<sup>13</sup>C  
16 NMR) spectra were recorded on a Bruker Fourier spectrometer (500 or 300 MHz) at ambient  
17 temperature with the chemical shifts recorded as  $\delta$  values in ppm units by reference to the  
18 hydrogenated residues of deuterated solvent as internal standard. Coupling constants (*J*) are given  
19 in Hz and signal patterns are indicated as follows: s, singlet; d, doublet; t, triplet; m, multiplet, br,  
20 broad signal. The melting points (m.p.) were determined on a Stuart Scientific SMP3 apparatus  
21 and are uncorrected. The SpectraSystems-LC-system consisted of a pump, an autosampler, and a  
22 UV detector. Mass spectrometry was performed on a MSQ electro spray mass spectrometer  
23 (Thermo Fisher, Dreieich, Germany). The system was operated by the standard software Xcalibur.  
24 A RP C18 NUCLEODUR 100-5 (125 x 3 mm) column (Macherey-Nagel GmbH, Dueren,  
25 Germany) was used as stationary phase. Solvent system: In a gradient run the percentage of  
26 acetonitrile (containing 0.1 % trifluoroacetic acid) in 0.1 % trifluoroacetic acid was increased  
27 from an initial concentration of 0% at 0 min to 100 % at 15 min and kept at 100 % for 5 min. The  
28 injection volume was 10  $\mu$ L and flow rate was set to 800  $\mu$ L/min. MS analysis was carried out at  
29 a spray voltage of 3800 V, a capillary temperature of 350 °C and a source CID of 10 V. Spectra  
30 were acquired in positive mode from 100 to 1000 *m/z* and at 254 nm for the UV trace.

31

1 **General Procedure for the Preparation of compound 1 – 27 (1, 2).**

2 To a stirred solution of the aniline (2.20 mmol) and triethylamine (404mg, 4.00 mmol) in CH<sub>2</sub>Cl<sub>2</sub>  
3 (4 mL) at 0 °C (ice bath) was added drop wise a solution of acyl chloride (2.00 mmol) in CH<sub>2</sub>Cl<sub>2</sub>  
4 (4 mL). The ice bath was removed and the reaction mixture was stirred for 2 h at room  
5 temperature. The solution was washed with 1N HCl and the organic layer was concentrated to  
6 give the crude product, which was purified by column chromatography (SiO<sub>2</sub>, *n*-hexane/EtOAc)  
7 to yield the amides **1a – 26a**.

8 The amide (1.00 mmol) and phosphorous pentachloride (260mg, 1.25 mmol) in 1, 2-  
9 dichloroethane (6 mL) was heated at 70 °C for 5 h. After cooling to room temperature, the  
10 solvent was evaporated under reduced pressure, toluene (2 mL) was added and the mixture was  
11 concentrated. The residual material was dissolved in acetonitrile (4 mL) and added at 0 °C to a  
12 solution of hydroxylamine (**1 – 25**) or *O*-methylhydroxylamine (**26**) or hydrazine (**27**) prepared  
13 by stirring the appropriate hydrochloride salt (2.50 mmol) and triethylamine (5.00 mmol) in  
14 acetonitrile (4 mL) at 0 °C for 1 h. After stirring at room temperature for 16 h, the solvent was  
15 removed *in vacuo*. The residue was dissolved partitioned between EtOAc and 0.5 N HCl. The  
16 organic layer was concentrated and purified by column chromatography (SiO<sub>2</sub>, *n*-hexane/EtOAc).

17 **Procedure for the Preparation of compound 6, 13 (3).**

18 A mixture of the nitro compound **1** or **8** (1.00 mmol) and stannous chloride hydrate (1.13 g,  
19 5.00 mmol) in absolute EtOH (4 mL) was stirred at 70 °C under a nitrogen atmosphere. After 30  
20 min the solid material disappeared indicating a complete reaction. The solution was cooled and  
21 poured into ice water. The pH was carefully adjusted to pH=7 – 8 by addition of 5% aqueous  
22 Na<sub>2</sub>CO<sub>3</sub> solution and the mixture was extracted with EtOAc (x mL). The organic layer was  
23 washed with saturated brine, dried (MgSO<sub>4</sub>) and concentrated under reduced pressure. The crude  
24 material was purified by column chromatography (SiO<sub>2</sub>, *n*-hexane/EtOAc).

25 **N'-hydroxy-N-phenyl-3-(trifluoromethyl)benzimidamide (CBR703)** white solid, m.p. 118 –  
26 120 °C; 73 % yield; Calc. for C<sub>14</sub>H<sub>11</sub>F<sub>3</sub>N<sub>2</sub>O (*MW* = 280.25): C, 60.00; H, 3.96; N, 10.00; found:  
27 C, 59.73; H, 3.82; N, 10.39; <sup>1</sup>H NMR (500 MHz, DMSO-*d*<sub>6</sub>): δ= 10.78 (br s, 1H), 8.46 (br s, 1H),  
28 7.71 (d, 1H, *J* = 7.6 Hz), 7.66 (s, 1H), 7.62 (d, 1H, *J* = 7.9 Hz), 7.55 (dd, 1H, *J* = 7.9, 7.6 Hz),  
29 7.08 (dd, 2H, *J* = 8.3, 7.5 Hz), 6.82 (t, 1H, *J* = 7.5 Hz), 6.66 (d, 2H, *J* = 8.3 Hz) ppm; <sup>13</sup>C NMR  
30 (125 MHz, DMSO-*d*<sub>6</sub>): δ= 147.9, 141.0, 133.9, 131.6, 129.4, 128.9 (q, *J*<sub>C-F</sub> = 31.2 Hz), 128.4,

1 125.4 (q,  $J_{C-F} = 3.7$  Hz), 123.9 (q,  $J_{C-F} = 272.2$  Hz), 123.8 (q,  $J_{C-F} = 3.7$  Hz), 121.0, 120.0 ppm;  
2 LC/MS:  $m/z$  (%):  $[M+H]^+$  281.01 (100 %),  $t_R = 11.15$  min, 99.2 % pure (UV).

3 **N-(4-nitrophenyl)-3-(trifluoromethyl)benzamide (1a)** slight yellow solid, m.p. 181 – 183 °C;  
4 65 % yield;  $^1H$  NMR (500 MHz,  $CDCl_3$ ):  $\delta = 8.29$  (d, 2H,  $J = 9.1$  Hz), 8.13 (m, 2H), 8.09 (d, 1H,  
5  $J = 7.9$  Hz), 7.87 (m, 3H), 7.69 (dd, 1H,  $J = 7.9, 7.9$  Hz) ppm; LC/MS:  $m/z$  (%):  $[M+MeCN]^+$   
6 351.67 (100 %),  $t_R = 12.17$  min, 98.6 % pure (UV).

7 **N'-hydroxy-N-(4-nitrophenyl)-3-(trifluoromethyl)benzimidamide (1)** slight yellow solid, m.p.  
8 195 – 197 °C; 43 % yield;  $^1H$  NMR (500 MHz,  $DMSO-d_6$ ):  $\delta = 11.46$  (br s, 1H), 9.42 (br s, 1H),  
9 8.01 (d, 2H,  $J = 9.3$  Hz), 7.80 (m, 2H), 7.74 (d, 1H,  $J = 7.6$  Hz), 7.64 (dd, 1H,  $J = 7.9, 7.6$  Hz),  
10 6.75 (d, 2H,  $J = 9.3$  Hz) ppm;  $^{13}C$  NMR (125 MHz,  $DMSO-d_6$ ):  $\delta = 148.3, 145.4, 139.4, 133.5,$   
11  $131.1, 129.9, 129.3$  (q,  $J_{C-F} = 32.1$  Hz), 126.1 (q,  $J_{C-F} = 3.7$  Hz), 124.9, 123.9 (q,  $J_{C-F} = 272.2$  Hz),  
12 123.3 (q,  $J_{C-F} = 3.7$  Hz), 122.8, 117.0 ppm; LC/MS:  $m/z$  (%):  $[M+H]^+$  325.80 (100 %),  $t_R = 10.96$   
13 min, 98.1 % pure (UV).

14 **N-(p-tolyl)-3-(trifluoromethyl)benzamide (2a)** white solid, m.p. 128 – 130 °C; 79 % yield;  $^1H$   
15 NMR (500 MHz,  $DMSO-d_6$ ):  $\delta = 10.39$  (br s, 1H), 8.28 (s, 1H), 8.25 (d, 1H,  $J = 7.9$  Hz), 7.95 (d,  
16 1H,  $J = 8.1$  Hz), 7.78 (dd, 1H,  $J = 8.1, 7.9$  Hz), 7.65 (d, 2H,  $J = 8.5$  Hz), 7.18 (d, 2H,  $J = 8.5$  Hz),  
17 2.29 (s, 3H) ppm; LC/MS:  $m/z$  (%):  $[M+MeCN]^+$  351.67 (100 %),  $t_R = 12.17$  min, 98.6 % pure  
18 (UV).

19 **N'-hydroxy-N-(p-tolyl)-3-(trifluoromethyl)benzimidamide (2)** white solid, m.p. 170 – 172 °C;  
20 48 % yield;  $^1H$  NMR (500 MHz,  $DMSO-d_6$ ):  $\delta = 10.68$  (br s, 1H), 8.31 (s, 1H), 7.69 (d, 1H,  $J =$   
21  $7.6$  Hz), 7.66 (s, 1H), 7.57 (d, 1H,  $J = 7.9$  Hz), 7.53 (dd, 1H,  $J = 7.9, 7.6$  Hz), 6.89 (d, 2H,  $J = 8.2$   
22 Hz), 6.56 (d, 2H,  $J = 8.2$  Hz), 2.14 (s, 3H) ppm;  $^{13}C$  NMR (125 MHz,  $DMSO-d_6$ ):  $\delta = 148.3,$   
23  $138.4, 134.0, 131.6, 130.1, 129.3, 128.9, 128.8$  (q,  $J_{C-F} = 32.1$  Hz), 125.3 (q,  $J_{C-F} = 3.7$  Hz), 123.9  
24 (q,  $J_{C-F} = 272.2$  Hz), 123.8 (q,  $J_{C-F} = 3.7$  Hz), 120.5, 20.1 ppm; LC/MS:  $m/z$  (%):  $[M+H]^+$  294.88  
25 (100 %),  $t_R = 11.82$  min, 100 % pure (UV).

26 **3-(trifluoromethyl)-N-(4-(trifluoromethyl)phenyl)benzamide (3a)** white solid, m.p. 145 – 147  
27 °C; 81 % yield;  $^1H$  NMR (500 MHz,  $DMSO-d_6$ ):  $\delta = 10.78$  (br s, 1H), 8.31 (s, 1H), 8.28 (d, 1H,  $J$   
28  $= 7.9$  Hz), 8.00 (m, 3H), 7.81 (dd, 1H,  $J = 8.1, 7.9$  Hz), 7.75 (d, 2H,  $J = 8.5$  Hz) ppm; LC/MS:  
29  $m/z$  (%):  $[M+MeCN]^+$  374.63 (100 %),  $t_R = 13.61$  min, 99.3 % pure (UV).

1 **N'-hydroxy-3-(trifluoromethyl)-N-(4-(trifluoromethyl)phenyl)benzimidamide (3)** white solid,  
2 m.p. 173 –175 °C; 56 % yield; <sup>1</sup>H NMR (500 MHz, DMSO-d<sub>6</sub>): δ= 11.15 (br s, 1H), 8.97 (br s,  
3 1H), 7.76 (d, 1H, *J* = 7.6 Hz), 7.74 (s, 1H), 7.68 (d, 1H, *J* = 7.9 Hz), 7.60 (dd, 1H, *J* = 7.9, 7.6 Hz),  
4 7.43 (d, 2H, *J* = 8.5 Hz), 6.77 (d, 2H, *J* = 8.5 Hz) ppm; <sup>13</sup>C NMR (125 MHz, DMSO-d<sub>6</sub>): δ= 146.5,  
5 145.0, 133.6, 131.3, 129.7, 129.2 (q, *J*<sub>C-F</sub> = 32.1 Hz), 125.8 (q, *J*<sub>C-F</sub> = 2.8 Hz), 125.6 (q, *J*<sub>C-F</sub> = 3.7  
6 Hz), 123.9 (q, *J*<sub>C-F</sub> = 272.2 Hz), 123.6 (q, *J*<sub>C-F</sub> = 3.7 Hz), 120.2 (q, *J*<sub>C-F</sub> = 32.1 Hz), 118.4 ppm;  
7 LC/MS: *m/z* (%): [M+H]<sup>+</sup> 348.69 (100 %), *t*<sub>R</sub> = 12.56 min, 94.9 % pure (UV).

8 **N-(4-cyanophenyl)-3-(trifluoromethyl)benzamide (4a)** white solid, m.p. 182 – 184 °C; 70 %  
9 yield; <sup>1</sup>H NMR (500 MHz, DMSO-d<sub>6</sub>): δ= 10.83 (br s, 1H), 8.29 (s, 1H), 8.26 (d, 1H, *J* = 7.9 Hz),  
10 7.95 (m, 3H), 7.84 (d, 2H, *J* = 8.8 Hz), 7.80 (dd, 1H, *J* = 8.1, 7.9 Hz) ppm; LC/MS: *m/z* (%): [M+  
11 MeCN]<sup>+</sup> 331.74 (100 %), *t*<sub>R</sub> = 12.11 min, 95.4 % pure (UV).

12 **N-(4-cyanophenyl)-N'-hydroxy-3-(trifluoromethyl)benzimidamide (4)** white solid, m.p. 165 –  
13 167 °C; 40 % yield; <sup>1</sup>H NMR (500 MHz, DMSO-d<sub>6</sub>): δ= 11.29 (br s, 1H), 9.14 (br s, 1H), 7.78 (d,  
14 1H, *J* = 7.6 Hz), 7.76 (s, 1H), 7.69 (d, 1H, *J* = 7.9 Hz), 7.62 (dd, 1H, *J* = 7.9, 7.6 Hz), 7.53 (d, 2H,  
15 *J* = 9.0 Hz), 6.73 (d, 2H, *J* = 9.0 Hz) ppm; <sup>13</sup>C NMR (125 MHz, DMSO-d<sub>6</sub>): δ= 145.9, 145.8,  
16 133.5, 132.8, 131.2, 129.8, 129.6, 129.3 (q, *J*<sub>C-F</sub> = 32.1 Hz), 126.0 (q, *J*<sub>C-F</sub> = 3.7 Hz), 123.9 (q, *J*<sub>C-F</sub>  
17 = 272.2 Hz), 123.5 (q, *J*<sub>C-F</sub> = 4.6 Hz), 119.5, 118.2, 101.2 ppm; LC/MS: *m/z* (%): [M+H]<sup>+</sup> 305.88  
18 (100 %), *t*<sub>R</sub> = 10.48 min, 96.8 % pure (UV).

19 **N-(4-methoxyphenyl)-3-(trifluoromethyl)benzamide (5a)** white solid, m.p. 129 – 131 °C; 79  
20 % yield; <sup>1</sup>H NMR (500 MHz, DMSO-d<sub>6</sub>): δ= 10.34 (br s, 1H), 8.26 (m, 2H), 7.95 (d, 1H, *J* = 7.8  
21 Hz), 7.77 (dd, 1H, *J* = 7.8, 7.6 Hz), 7.67 (d, 2H, *J* = 9.0 Hz), 6.94 (d, 2H, *J* = 9.0 Hz), 3.75 (s, 3H)  
22 ppm; LC/MS: *m/z* (%): [M+H]<sup>+</sup> 295.87 (100 %), *t*<sub>R</sub> = 11.83 min, 100 % pure (UV).

23 **N'-hydroxy-N-(4-methoxyphenyl)-3-(trifluoromethyl)benzimidamide (5)** white solid, m.p.  
24 140 – 142 °C; 53 % yield; <sup>1</sup>H NMR (500 MHz, DMSO-d<sub>6</sub>): δ= 10.56 (br s, 1H), 8.20 (br s, 1H),  
25 7.67 (d, 1H, *J* = 7.6 Hz), 7.64 (s, 1H), 7.56 (d, 1H, *J* = 7.9 Hz), 7.52 (dd, 1H, *J* = 7.9, 7.6 Hz),  
26 7.69 (d, 2H, *J* = 8.8 Hz), 6.63 (d, 2H, *J* = 8.8 Hz), 3.63 (s, 3H) ppm; <sup>13</sup>C NMR (125 MHz, DMSO-  
27 d<sub>6</sub>): δ= 154.4, 148.8, 133.9, 131.8, 129.2, 128.8 (q, *J*<sub>C-F</sub> = 32.1 Hz), 125.2 (q, *J*<sub>C-F</sub> = 3.7 Hz), 124.1  
28 (q, *J*<sub>C-F</sub> = 3.7 Hz), 123.9 (q, *J*<sub>C-F</sub> = 272.2 Hz), 122.7, 113.8, 55.1 ppm; LC/MS: *m/z* (%): [M+H]<sup>+</sup>  
29 310.88 (100 %), *t*<sub>R</sub> = 10.93 min, 95.5 % pure (UV).

1 **N-(4-aminophenyl)-N'-hydroxy-3-(trifluoromethyl)benzimidamide (6)** white solid, m.p. 131 –  
2 133 °C; 33 % yield; <sup>1</sup>H NMR (500 MHz, DMSO-d<sub>6</sub>): δ= 10.83 (br s, 1H), 9.12 (br s, 1H), 7.71 (d,  
3 1H, *J* = 7.6 Hz), 7.68 (s, 1H), 7.60 (d, 1H, *J* = 7.9 Hz), 7.57 (dd, 1H, *J* = 7.9, 7.6 Hz), 6.93 (d, 2H,  
4 *J* = 8.2 Hz), 6.61 (d, 2H, *J* = 8.2 Hz), 4.87 (s, 2H) ppm; <sup>13</sup>C NMR (125 MHz, DMSO-d<sub>6</sub>): δ=  
5 148.3, 138.7, 134.0, 131.5, 130.0, 129.2, 128.9 (q, *J*<sub>C-F</sub> = 32.1 Hz), 128.8, 125.3 (q, *J*<sub>C-F</sub> = 3.7 Hz),  
6 124.0 (q, *J*<sub>C-F</sub> = 3.7 Hz), 123.9 (q, *J*<sub>C-F</sub> = 272.2 Hz), 121.0 ppm; LC/MS: *m/z* (%): [M+H]<sup>+</sup> 295.89  
7 (100 %), *t*<sub>R</sub> = 8.98 min, 96.8 % pure (UV).

8 **N-(4-chlorophenyl)-3-(trifluoromethyl)benzamide (7a)** white solid, m.p. 136 – 138°C; 85 %  
9 yield; <sup>1</sup>H NMR (500 MHz, DMSO-d<sub>6</sub>): δ= 10.58 (br s, 1H), 8.28 (s, 1H), 8.26 (d, 1H, *J* = 7.6 Hz),  
10 7.97 (d, 1H, *J* = 7.9 Hz), 7.77 (m, 3H), 7.44 (d, 2H, *J* = 9.1 Hz) ppm; LC/MS: *m/z* (%): [M+  
11 MeCN]<sup>+</sup> 340.55 (100 %), *t*<sub>R</sub> = 12.74 min, 99.5 % pure (UV).

12 **N-(4-chlorophenyl)-N'-hydroxy-3-(trifluoromethyl)benzimidamide (7)** white solid, m.p. 173 –  
13 175 °C; 50 % yield; <sup>1</sup>H NMR (500 MHz, DMSO-d<sub>6</sub>): δ= 10.90 (br s, 1H), 8.64 (br s, 1H), 7.73 (d,  
14 1H, *J* = 7.6 Hz), 7.69 (s, 1H), 7.62 (d, 1H, *J* = 7.9 Hz), 7.57 (dd, 1H, *J* = 7.9, 7.6 Hz), 7.13 (d, 2H,  
15 *J* = 9.0 Hz), 6.65 (d, 2H, *J* = 9.0 Hz) ppm; <sup>13</sup>C NMR (125 MHz, DMSO-d<sub>6</sub>): δ= 147.4, 140.1,  
16 133.6, 131.5, 129.5, 129.1 (q, *J*<sub>C-F</sub> = 32.1 Hz), 128.2, 125.6 (q, *J*<sub>C-F</sub> = 3.7 Hz), 124.6, 123.9 (q, *J*<sub>C-F</sub>  
17 = 272.2 Hz), 123.8 (q, *J*<sub>C-F</sub> = 3.7 Hz), 121.2 ppm; LC/MS: *m/z* (%): [M+H]<sup>+</sup> 314.80 (100 %), *t*<sub>R</sub> =  
18 11.81 min, 99.2 % pure (UV).

19 **N-(3-nitrophenyl)-3-(trifluoromethyl)benzamide (8a)** slight yellow solid, m.p. 160 – 162 °C;  
20 69 % yield; <sup>1</sup>H NMR (500 MHz, DMSO-d<sub>6</sub>): δ= 10.39 (br s, 1H), 8.78 (dd, 1H, *J* = 2.2, 2.2 Hz),  
21 8.34 (s, 1H), 8.30 (d, 1H, *J* = 7.9 Hz), 8.21 (m, 1H), 8.00 (m, 2H), 7.82 (dd, 1H, *J* = 8.2, 8.2 Hz),  
22 7.69 (dd, 1H, *J* = 7.9, 7.6 Hz) ppm; LC/MS: *m/z* (%): [M+ MeCN]<sup>+</sup> 351.55 (100 %), *t*<sub>R</sub> = 12.64  
23 min, 99.2 % pure (UV).

24 **N'-hydroxy-N-(3-nitrophenyl)-3-(trifluoromethyl)benzimidamide (8)** slight yellow solid, m.p.  
25 163.0 – 164.4 °C; 40 % yield; <sup>1</sup>H NMR (500 MHz, DMSO-d<sub>6</sub>): δ= 11.17 (br s, 1H), 9.08 (br s, 1H),  
26 7.77 (m, 2H), 7.72 (d, 1H, *J* = 7.6 Hz), 7.61 (m, 2H), 7.52 (dd, 1H, *J* = 2.5, 2.2 Hz), 7.36 (dd, 1H,  
27 *J* = 8.2, 8.2 Hz), 6.98 (m, 1H) ppm; <sup>13</sup>C NMR (125 MHz, DMSO-d<sub>6</sub>): δ= 147.9, 146.2, 142.6,  
28 133.5, 131.4, 129.8, 129.5, 129.3 (q, *J*<sub>C-F</sub> = 32.1 Hz), 125.9 (q, *J*<sub>C-F</sub> = 3.7 Hz), 124.7, 123.9 (q, *J*<sub>C-F</sub>  
29 = 272.2 Hz), 123.7 (q, *J*<sub>C-F</sub> = 3.7 Hz), 114.6, 112.7 ppm; LC/MS: *m/z* (%): [M+H]<sup>+</sup> 325.81 (100  
30 %), *t*<sub>R</sub> = 11.30 min, 100 % pure (UV).

1 **N-(m-tolyl)-3-(trifluoromethyl)benzamide (9a)** white solid, m.p. 116 – 118 °C; 77 % yield; <sup>1</sup>H  
2 NMR (500 MHz, DMSO-d<sub>6</sub>): δ= 10.38 (br s, 1H), 8.29 (s, 1H), 8.25 (d, 1H, *J* = 7.9 Hz), 7.96 (d,  
3 1H, *J* = 7.8 Hz), 7.78 (dd, 1H, *J* = 7.9, 7.8 Hz), 7.61 (s, 1H), 7.57 (d, 1H, *J* = 8.0 Hz), 7.25 (dd,  
4 1H, *J* = 8.0, 7.5 Hz), 6.95 (d, 1H, *J* = 7.5 Hz), 2.32 (s, 3H) ppm; LC/MS: *m/z* (%): [M+H]<sup>+</sup>  
5 279.90 (100 %), t<sub>R</sub>= 12.74 min, 100 % pure (UV).

6 **N'-hydroxy-N-(m-tolyl)-3-(trifluoromethyl)benzimidamide (9)** white solid, m.p. 95 – 97 °C;  
7 44 % yield; <sup>1</sup>H NMR (500 MHz, DMSO-d<sub>6</sub>): δ= 10.77 (br s, 1H), 8.36 (br s, 1H), 7.71 (d, 1H, *J* =  
8 8.0 Hz), 7.66 (s, 1H), 7.61 (d, 1H, *J* = 7.6 Hz), 7.55 (dd, 1H, *J* = 8.0, 7.6 Hz), 6.93 (dd, 1H, *J* =  
9 7.9, 7.6 Hz), 6.83 (d, 1H, *J* = 7.6 Hz), 6.57 (s, 1H), 6.35 (m, 1H), 2.11 (s, 3H) ppm; <sup>13</sup>C NMR  
10 (125 MHz, DMSO-d<sub>6</sub>): δ= 148.0, 140.9, 137.6, 134.0, 131.5, 129.4, 128.9 (q, *J*<sub>C-F</sub> = 32.1 Hz),  
11 128.2, 125.4 (q, *J*<sub>C-F</sub> = 3.7 Hz), 123.9 (q, *J*<sub>C-F</sub> = 272.2 Hz), 123.8 (q, *J*<sub>C-F</sub> = 4.6 Hz), 121.8, 120.6,  
12 117.2, 21.0 ppm; LC/MS: *m/z* (%): [M+H]<sup>+</sup> 294.89 (100 %), t<sub>R</sub>= 11.93 min, 96.7 % pure (UV).

13 **3-(trifluoromethyl)-N-(3-(trifluoromethyl)phenyl)benzamide (10a)** white solid, m.p. 126 –  
14 128 °C; 83 % yield; <sup>1</sup>H NMR (500 MHz, CDCl<sub>3</sub>): δ= 8.13 (s, 1H), 8.07 (d, 1H, *J* = 7.9 Hz), 8.00  
15 (br s, 1H), 7.94 (s, 1H), 7.88 (d, 1H, *J* = 8.0 Hz), 7.83 (d, 1H, *J* = 7.9 Hz), 7.65 (dd, 1H, *J* = 7.9,  
16 7.9 Hz), 7.51 (dd, 1H, *J* = 8.0, 7.8 Hz), 7.44 (d, 1H, *J* = 7.8 Hz) ppm; LC/MS: *m/z* (%): [M+  
17 MeCN]<sup>+</sup> 374.63 (100 %), t<sub>R</sub>= 12.98 min, 99.1 % pure (UV).

18 **N'-hydroxy-3-(trifluoromethyl)-N-(3-(trifluoromethyl)phenyl)benzimidamide (10)** white  
19 solid, m.p. 104 – 106 °C; 55 % yield; <sup>1</sup>H NMR (500 MHz, CDCl<sub>3</sub>): δ= 8.59 (br s, 1H), 7.75 (s, 1H),  
20 7.66 (d, 1H, *J* = 7.8 Hz), 7.57 (d, 1H, *J* = 7.9 Hz), 7.45 (dd, 1H, *J* = 7.9, 7.8 Hz), 7.38 (br s, 1H),  
21 7.21 (m, 2H), 6.91 (s, 1H), 6.77 (d, 1H, *J* = 7.6 Hz) ppm; <sup>13</sup>C NMR (125 MHz, CDCl<sub>3</sub>): δ= 150.2,  
22 139.7, 131.5, 131.4 (q, *J*<sub>C-F</sub> = 33.0 Hz), 131.2 (q, *J*<sub>C-F</sub> = 33.0 Hz), 129.5, 129.2, 126.7 (q, *J*<sub>C-F</sub> = 3.7  
23 Hz), 125.1 (q, *J*<sub>C-F</sub> = 3.7 Hz), 124.0, 123.6 (q, *J*<sub>C-F</sub> = 272.2 Hz), 123.5 (q, *J*<sub>C-F</sub> = 272.2 Hz), 119.6  
24 (q, *J*<sub>C-F</sub> = 3.7 Hz), 117.6 (q, *J*<sub>C-F</sub> = 3.7 Hz) ppm; LC/MS: *m/z* (%): [M+H]<sup>+</sup> 348.70 (100 %), t<sub>R</sub>=  
25 12.11 min, 100 % pure (UV).

26 **N-(3-cyanophenyl)-3-(trifluoromethyl)benzamide (11a)** white solid, m.p. 142 – 144 °C; 80 %  
27 yield; <sup>1</sup>H NMR (500 MHz, DMSO-d<sub>6</sub>): δ= 10.75 (br s, 1H), 8.30 (s, 1H), 8.27 (d, 1H, *J* = 7.9 Hz),  
28 8.24 (s, 1H), 8.05 (m, 1H), 8.00 (d, 1H, *J* = 7.6 Hz), 7.81 (dd, 1H, *J* = 7.9, 7.6 Hz), 7.60 (m, 2H)  
29 ppm; LC/MS: *m/z* (%): [M+ MeCN]<sup>+</sup> 331.92 (100 %), t<sub>R</sub>= 12.10 min, 98.2 % pure (UV).

1 **N-(3-cyanophenyl)-N'-hydroxy-3-(trifluoromethyl)benzimidamide (11)** white solid, m.p. 152  
2 – 154 °C; 45 % yield; <sup>1</sup>H NMR (500 MHz, DMSO-d<sub>6</sub>): δ= 11.08 (br s, 1H), 8.90 (br s, 1H), 7.76  
3 (d, 1H, *J* = 7.9 Hz), 7.73 (s, 1H), 7.67 (d, 1H, *J* = 7.6 Hz), 7.60 (dd, 1H, *J* = 7.9, 7.6 Hz), 7.28 (dd,  
4 1H, *J* = 8.2, 7.6 Hz), 7.23 (d, 1H, *J* = 7.6 Hz), 7.05 (s, 1H), 6.88 (d, 1H, *J* = 8.2 Hz) ppm; <sup>13</sup>C  
5 NMR (125 MHz, DMSO-d<sub>6</sub>): δ= 146.5, 142.1, 133.4, 131.5, 129.7, 129.6, 129.2 (q, *J*<sub>C-F</sub> = 31.2  
6 Hz), 125.8 (q, *J*<sub>C-F</sub> = 3.7 Hz), 123.9 (q, *J*<sub>C-F</sub> = 272.2 Hz), 123.8 (q, *J*<sub>C-F</sub> = 3.7 Hz), 123.8, 123.7,  
7 121.8, 118.8, 111.1 ppm; LC/MS: *m/z* (%): [M+ MeCN]<sup>+</sup> 346.77 (100 %), t<sub>R</sub> = 10.27 min, 97.7 %  
8 pure (UV).

9 **N-(3-methoxyphenyl)-3-(trifluoromethyl)benzamide (12a)** white solid, m.p. 121 – 123 °C; 74  
10 % yield; <sup>1</sup>H NMR (500 MHz, DMSO-d<sub>6</sub>): δ= 10.43 (br s, 1H), 8.28 (s, 1H), 8.25 (d, 1H, *J* = 8.2  
11 Hz), 7.96 (d, 1H, *J* = 8.2 Hz), 7.79 (dd, 1H, *J* = 8.2, 8.2 Hz), 7.46 (dd, 1H, *J* = 2.4, 2.2 Hz), 7.37  
12 (d, 1H, *J* = 7.9 Hz), 7.28 (dd, 1H, *J* = 8.2, 7.9 Hz), 6.72 (dd, 1H, *J* = 8.2, 2.4 Hz), 3.76 (s, 3H)  
13 ppm; LC/MS: *m/z* (%): [M+H]<sup>+</sup> 295.84 (100 %), t<sub>R</sub> = 12.32 min, 96.5 % pure (UV).

14 **N'-hydroxy-N-(3-methoxyphenyl)-3-(trifluoromethyl)benzimidamide (12)** white solid, m.p.  
15 109 – 111 °C; 48 % yield; <sup>1</sup>H NMR (500 MHz, DMSO-d<sub>6</sub>): δ= 10.81 (br s, 1H), 8.44 (br s, 1H),  
16 7.72 (d, 1H, *J* = 8.2, 7.8 Hz), 8.68 (s, 1H), 7.62 (d, 1H, *J* = 7.9 Hz), 7.56 (dd, 1H, *J* = 7.9, 7.9 Hz),  
17 6.96 (dd, 1H, *J* = 3.0 Hz), 6.38 (dd, 1H, *J* = 8.2, 2.3 Hz), 6.26 (dd, 1H, *J* = 2.3, 2.0 Hz), 6.18 (dd,  
18 1H, *J* = 7.9, 2.0 Hz), 3.55 (s, 3H) ppm; <sup>13</sup>C NMR (125 MHz, DMSO-d<sub>6</sub>): δ= 159.4, 147.9, 142.2,  
19 134.0, 131.6, 129.4, 129.1, 129.0 (q, *J*<sub>C-F</sub> = 32.1 Hz) 125.4 (q, *J*<sub>C-F</sub> = 3.7 Hz), 123.9 (q, *J*<sub>C-F</sub> = 272.2  
20 Hz), 123.8 (q, *J*<sub>C-F</sub> = 3.7 Hz), 112.2, 106.5, 105.7, 54.6 ppm; LC/MS: *m/z* (%): [M+H]<sup>+</sup> 310.84  
21 (100 %), t<sub>R</sub> = 11.27 min, 97.4 % pure (UV).

22 **N-(3-aminophenyl)-N'-hydroxy-3-(trifluoromethyl)benzimidamide (13)** white solid, m.p. 130  
23 – 132 °C; 40 % yield; <sup>1</sup>H NMR (500 MHz, DMSO-d<sub>6</sub>): δ= 10.66 (br s, 1H), 8.01 (br s, 1H), 7.69  
24 (d, 1H, *J* = 7.9 Hz), 7.67 (s, 1H), 7.61 (d, 1H, *J* = 7.6 Hz), 7.54 (dd, 1H, *J* = 7.9, 7.6 Hz), 6.69 (dd,  
25 1H, *J* = 8.2, 7.9 Hz), 6.06 (m, 1H), 6.00 (dd, 1H, *J* = 2.2, 1.9 Hz), 5.75 (dd, 1H, *J* = 7.9, 2.2 Hz),  
26 4.88 (s, 2H) ppm; <sup>13</sup>C NMR (125 MHz, DMSO-d<sub>6</sub>): δ= 148.9, 148.5, 141.6, 134.2, 131.4, 129.2,  
27 128.8 (q, *J*<sub>C-F</sub> = 32.1 Hz), 128.7, 125.3 (q, *J*<sub>C-F</sub> = 3.7 Hz), 123.9 (q, *J*<sub>C-F</sub> = 272.2 Hz), 123.6 (q, *J*<sub>C-F</sub>  
28 = 4.6 Hz), 108.8, 107.9, 106.1 ppm; LC/MS: *m/z* (%): [M+H]<sup>+</sup> 295.88 (100 %), t<sub>R</sub> = 9.46 min, 100  
29 % pure (UV).

1 **N-phenyl-2-(trifluoromethyl)benzamide (14a)** white solid, m.p. 152 – 154 °C; 55 % yield; <sup>1</sup>H  
2 NMR (500 MHz, DMSO-d<sub>6</sub>): δ= 10.54 (br s, 1H), 7.85 (d, 1H, *J* = 7.9 Hz), 7.79 (dd, 1H, *J* = 7.9,  
3 7.6 Hz), 7.70 (m, 4H), 7.35 (dd, 2H, *J* = 8.5, 7.6 Hz), 7.11 (t, 1H, *J* = 7.6 Hz) ppm; LC/MS: *m/z*  
4 (%): [M+H]<sup>+</sup> 265.98 (100 %), *t<sub>R</sub>* = 10.95 min, 99.4 % pure (UV).

5 **N'-hydroxy-N-phenyl-2-(trifluoromethyl)benzimidamide (14)** white solid, m.p. 140 – 142 °C;  
6 49 % yield; <sup>1</sup>H NMR (500 MHz, DMSO-d<sub>6</sub>): δ= 10.52 (br s, 1H), 8.49 (br s, 1H), 7.78 (m, 1H),  
7 7.60 (m, 2H), 7.40 (m, 1H), 7.00 (dd, 2H, *J* = 7.6, 7.2 Hz), 6.76 (t, 1H, *J* = 7.2 Hz), 6.59 (d, 2H, *J*  
8 = 7.6 Hz) ppm; <sup>13</sup>C NMR (125 MHz, DMSO-d<sub>6</sub>): δ= 147.0, 140.2, 132.2, 131.8, 131.5, 129.6,  
9 128.4, 128.3, 128.1 (q, *J<sub>C-F</sub>* = 30.2 Hz), 126.7 (q, *J<sub>C-F</sub>* = 4.6 Hz), 123.8 (q, *J<sub>C-F</sub>* = 274.0 Hz), 121.3,  
10 119.7 ppm; LC/MS: *m/z* (%): [M+H]<sup>+</sup> 280.98 (100 %), *t<sub>R</sub>* = 10.30 min, 97.2 % pure (UV).

11 **N-phenyl-4-(trifluoromethyl)benzamide (15a)** white solid, m.p. 210.0 – 211.7 °C; 68 % yield;  
12 <sup>1</sup>H NMR (500 MHz, DMSO-d<sub>6</sub>): δ= 10.47 (br s, 1H), 8.15 (d, 2H, *J* = 8.4 Hz), 7.91 (d, 2H, *J* =  
13 8.4 Hz), 7.78 (d, 2H, *J* = 8.0 Hz), 7.37 (dd, 2H, *J* = 8.0, 7.4 Hz), 7.13 (t, 1H, *J* = 7.4 Hz) ppm;  
14 LC/MS: *m/z* (%): [M+H]<sup>+</sup> 265.89 (100 %), *t<sub>R</sub>* = 12.07 min, 97.4 % pure (UV).

15 **N'-hydroxy-N-phenyl-4-(trifluoromethyl)benzimidamide (15)** white solid, m.p. 133 – 136 °C;  
16 44 % yield; <sup>1</sup>H NMR (500 MHz, DMSO-d<sub>6</sub>): δ= 10.85 (br s, 1H), 8.45 (br s, 1H), 7.69 (d, 2H, *J* =  
17 8.0 Hz), 7.57 (d, 2H, *J* = 8.0 Hz), 7.08 (dd, 2H, *J* = 7.6, 7.5 Hz), 6.80 (t, 1H, *J* = 7.5 Hz), 6.65 (d,  
18 2H, *J* = 7.6 Hz) ppm; <sup>13</sup>C NMR (125 MHz, DMSO-d<sub>6</sub>): δ= 148.1, 141.0, 137.0, 129.0 (q, *J<sub>C-F</sub>* =  
19 31.2 Hz), 128.5, 128.3, 125.2 (q, *J<sub>C-F</sub>* = 3.7 Hz), 124.0 (q, *J<sub>C-F</sub>* = 272.2 Hz), 120.9, 119.9 ppm;  
20 LC/MS: *m/z* (%): [M+H]<sup>+</sup> 280.96 (100 %), *t<sub>R</sub>* = 11.39 min, 93.6 % pure (UV).

21 **3-cyano-N-phenylbenzamide (16a)** white solid, m.p. 175 – 177 °C; 82 % yield; <sup>1</sup>H NMR (500  
22 MHz, DMSO-d<sub>6</sub>): δ= 10.41 (br s, 1H), 8.40 (dd, 1H, *J* = 1.6, 1.3 Hz), 8.25 (m, 1H), 8.06 (ddd, 1H,  
23 *J* = 7.9, 1.6, 1.3 Hz), 7.76 (m, 3H), 7.38 (dd, 2H, *J* = 8.5, 7.6 Hz), 7.13 (t, 1H, *J* = 7.6 Hz) ppm;  
24 LC/MS: *m/z* (%): [M+H]<sup>+</sup> 223.17 (100 %), *t<sub>R</sub>* = 10.14 min, 98.5 % pure (UV).

25 **3-cyano-N'-hydroxy-N-phenylbenzimidamide (16)** white solid, m.p. 145 – 147 °C; 43 % yield;  
26 <sup>1</sup>H NMR (500 MHz, DMSO-d<sub>6</sub>): δ= 10.82 (br s, 1H), 8.47 (br s, 1H), 7.81 (ddd, 1H, *J* = 7.6, 1.6,  
27 1.3 Hz), 7.76 (dd, 1H, *J* = 1.6, 1.6 Hz), 7.63 (dt, 1H, *J* = 8.2, 1.6, 1.3 Hz), 7.52 (dd, 1H, *J* = 8.2,  
28 7.6 Hz), 7.09 (dd, 2H, *J* = 8.5, 7.2 Hz), 6.82 (t, 1H, *J* = 7.2 Hz), 6.65 (d, 2H, *J* = 8.5 Hz) ppm; <sup>13</sup>C  
29 NMR (125 MHz, DMSO-d<sub>6</sub>): δ= 147.6, 140.9, 134.2, 132.5, 132.3, 131.0, 129.5, 128.4, 121.1,



1 120.1, 118.4, 111.4 ppm; LC/MS:  $m/z$  (%):  $[M+H]^+$  238.12(100 %),  $t_R$ = 9.27 min, 95.2 % pure  
2 (UV).

3 **3-chloro-N-phenylbenzamide (17a)** white solid, m.p. 142 – 144 °C; 89 % yield;  $^1H$  NMR (500  
4 MHz, DMSO- $d_6$ ):  $\delta$ = 10.34 (br s, 1H), 8.00 (dd, 1H,  $J$  = 1.9, 1.6 Hz), 7.91 (m, 1H), 7.76 (d, 2H,  $J$   
5 = 8.0 Hz), 7.66 (m, 1H), 7.57 (dd, 1H,  $J$  = 7.9, 7.6 Hz), 7.36 (dd, 2H,  $J$  = 8.0, 7.6 Hz), 7.12 (t, 1H,  
6  $J$  = 7.6 Hz) ppm; LC/MS:  $m/z$  (%):  $[M+H]^+$  232.06 (100 %),  $t_R$ = 11.61 min, 99.4 % pure (UV).

7 **3-chloro-N'-hydroxy-N-phenylbenzimidamide (17)** white solid, m.p. 102 – 104 °C; 55 % yield;  
8  $^1H$  NMR (500 MHz, DMSO- $d_6$ ):  $\delta$ = 10.72 (br s, 1H), 8.37 (br s, 1H), 7.41 (m, 1H), 7.39 (dd, 1H,  
9  $J$  = 1.6, 1.6 Hz), 7.34 (dd, 1H,  $J$  = 7.9, 7.6 Hz), 7.28 (ddd, 1H,  $J$  = 7.9, 1.6, 1.3 Hz), 7.08 (dd, 2H,  
10  $J$  = 8.0, 7.6 Hz), 6.80 (t, 1H,  $J$  = 7.6 Hz), 6.66 (d, 2H,  $J$  = 8.0 Hz) ppm;  $^{13}C$  NMR (125 MHz,  
11 DMSO- $d_6$ ):  $\delta$ = 148.0, 141.1, 135.0, 132.8, 130.1, 128.8, 128.4, 127.2, 126.3, 120.9, 119.8 ppm;  
12 LC/MS:  $m/z$  (%):  $[M+H]^+$  246.95 (100 %),  $t_R$ = 10.73 min, 98.7 % pure (UV).

13 **4-nitro-N-phenyl-3-(trifluoromethyl)benzamide (18a)** white solid, m.p. 185 – 187 °C; 51 %  
14 yield;  $^1H$  NMR (500 MHz, DMSO- $d_6$ ):  $\delta$ = 10.68 (br s, 1H), 8.50 (s, 1H), 8.46 (d, 1H,  $J$  = 8.3 Hz),  
15 8.34 (d, 1H,  $J$  = 8.3 Hz), 7.76 (d, 2H,  $J$  = 8.0 Hz), 7.40 (dd, 2H,  $J$  = 8.5, 7.6 Hz), 7.17 (t, 1H,  $J$  =  
16 7.3 Hz) ppm; LC/MS:  $m/z$  (%):  $[M+ MeCN]^+$  351.41(100 %),  $t_R$ = 11.73 min, 100 % pure (UV).

17 **N'-hydroxy-4-nitro-N-phenyl-3-(trifluoromethyl)benzimidamide (18)** white solid, m.p. 167 –  
18 169 °C; 47 % yield;  $^1H$  NMR (500 MHz, DMSO- $d_6$ ):  $\delta$ = 11.19 (br s, 1H), 8.66 (br s, 1H), 8.10 (d,  
19 1H,  $J$  = 8.5 Hz), 7.91 (d, 1H,  $J$  = 1.9 Hz), 7.81 (dd, 1H,  $J$  = 8.5, 1.9 Hz), 7.13 (dd, 2H,  $J$  = 8.0, 7.6  
20 Hz), 6.86 (t, 1H,  $J$  = 7.6 Hz), 6.70 (d, 2H,  $J$  = 8.0 Hz) ppm;  $^{13}C$  NMR (125 MHz, DMSO- $d_6$ ):  $\delta$ =  
21 146.7, 140.6, 137.8, 132.8, 128.6, 126.5 (q,  $J_{C-F}$  = 5.5 Hz), 125.8, 124.0 (q,  $J_{C-F}$  = 273.1 Hz), 121.5,  
22 121.4 (q,  $J_{C-F}$  = 33.0 Hz), 120.3 ppm; LC/MS:  $m/z$  (%):  $[M+H]^+$  325.76 (100 %),  $t_R$ = 11.09 min,  
23 98.5 % pure (UV).

24 **4-fluoro-N-phenyl-3-(trifluoromethyl)benzamide (19a)** white solid, m.p. 167 – 169 °C; 58 %  
25 yield;  $^1H$  NMR (500 MHz, DMSO- $d_6$ ):  $\delta$ = 10.46 (br s, 1H), 8.35 (m, 2H), 7.75 (d, 2H,  $J$  = 8.0  
26 Hz), 7.71 (dd, 1H,  $J$  = 10.4, 8.8 Hz), 7.38 (dd, 2H,  $J$  = 8.0, 7.6 Hz), 7.14 (t, 1H,  $J$  = 7.6 Hz) ppm;  
27 LC/MS:  $m/z$  (%):  $[M+H]^+$  283.78 (100 %),  $t_R$ = 11.84 min, 100 % pure (UV).

28 **4-fluoro-N'-hydroxy-N-phenyl-3-(trifluoromethyl)benzimidamide (19)** white solid, m.p. 136 –  
29 138 °C; 49 % yield;  $^1H$  NMR (500 MHz, DMSO- $d_6$ ):  $\delta$ = 10.81 (br s, 1H), 8.52 (br s, 1H), 7.69

1 (dd, 1H,  $J = 6.9, 1.9$  Hz), 7.65 (m, 1H), 7.47 (dd, 1H,  $J = 10.4, 9.1$  Hz), 7.10 (dd, 2H,  $J = 8.0, 7.6$   
2 Hz), 6.83 (t, 1H,  $J = 7.6$  Hz), 6.67 (d, 2H,  $J = 8.0$  Hz) ppm;  $^{13}\text{C}$  NMR (125 MHz, DMSO- $d_6$ ):  $\delta =$   
3 158.8 (dq,  $J_{\text{C-F}} = 255.7, 1.8$  Hz), 147.2, 140.8, 134.3 (d,  $J_{\text{C-F}} = 9.2$  Hz), 129.8 (d,  $J_{\text{C-F}} = 3.7$  Hz),  
4 128.5, 126.1 (q,  $J_{\text{C-F}} = 4.6$  Hz), 122.3 (q,  $J_{\text{C-F}} = 272.2$  Hz), 121.2, 120.2, 117.2 (dq,  $J_{\text{C-F}} = 20.6,$   
5 12.8 Hz) ppm; LC/MS:  $m/z$  (%):  $[\text{M}+\text{H}]^+$  298.83 (100 %),  $t_{\text{R}} = 11.13$  min, 98.5 % pure (UV).

6 **3-chloro-4-fluoro-N-phenylbenzamide (20a)** white solid, m.p. 157 – 159 °C; 71 % yield;  $^1\text{H}$   
7 NMR (500 MHz, DMSO- $d_6$ ):  $\delta = 10.34$  (br s, 1H), 8.20 (dd, 1H,  $J = 8.0, 2.2$  Hz), 8.00 (m, 1H),  
8 7.75 (d, 2H,  $J = 8.2$  Hz), 7.59 (dd, 1H,  $J = 8.8, 8.0$  Hz), 7.36 (dd, 2H,  $J = 8.2, 7.6$  Hz), 7.12 (t, 1H,  
9  $J = 7.6$  Hz) ppm; LC/MS:  $m/z$  (%):  $[\text{M}+\text{H}]^+$  249.86 (100 %),  $t_{\text{R}} = 11.33$  min, 99.2 % pure (UV).

10 **3-chloro-4-fluoro-N'-hydroxy-N-phenylbenzimidamide (20)** white solid, m.p. 138 – 140 °C; 47  
11 % yield;  $^1\text{H}$  NMR (500 MHz, DMSO- $d_6$ ):  $\delta = 10.74$  (br s, 1H), 8.43 (br s, 1H), 7.69 (dd, 1H,  $J =$   
12 7.1, 2.0 Hz), 7.65 (m, 1H), 7.47 (dd, 1H,  $J = 9.1, 8.8$  Hz), 7.10 (dd, 2H,  $J = 8.0, 7.6$  Hz), 6.83 (t,  
13 1H,  $J = 7.6$  Hz), 6.67 (d, 2H,  $J = 8.0$  Hz) ppm;  $^{13}\text{C}$  NMR (125 MHz, DMSO- $d_6$ ):  $\delta = 157.3$  (d,  $J_{\text{C-F}}$   
14  $= 248.4$  Hz), 147.3, 141.0, 130.7 (d,  $J_{\text{C-F}} = 3.7$  Hz), 129.5, 128.5, 128.4, 121.0, 120.0, 119.4 (d,  $J_{\text{C-F}}$   
15  $= 18.3$  Hz), 116.8 (d,  $J_{\text{C-F}} = 22.0$  Hz) ppm; LC/MS:  $m/z$  (%):  $[\text{M}+\text{H}]^+$  264.80 (100 %),  $t_{\text{R}} = 10.70$   
16 min, 97.2 % pure (UV).

17 **4-(trifluoromethyl)-N-(3-(trifluoromethyl)phenyl)benzamide (21a)** white solid, m.p. 117 –  
18 119 °C; 77 % yield;  $^1\text{H}$  NMR (500 MHz,  $\text{CDCl}_3$ ):  $\delta = 7.99$  (d, 2H,  $J = 8.0$  Hz), 7.94 (s, 1H), 7.86  
19 (d, 1H,  $J = 8.0$  Hz), 7.77 (d, 2H,  $J = 8.0$  Hz), 7.51 (dd, 1H,  $J = 8.2, 8.0$  Hz), 7.44 (d, 1H,  $J = 8.2$   
20 Hz) ppm; LC/MS:  $m/z$  (%):  $[\text{M}+\text{MeCN}]^+$  374.65 (100 %),  $t_{\text{R}} = 13.04$  min, 99.4 % pure (UV).

21 **N'-hydroxy-4-(trifluoromethyl)-N-(3-(trifluoromethyl)phenyl)benzimidamide (21)** white  
22 solid, m.p. 147 – 149 °C; 53 % yield;  $^1\text{H}$  NMR (500 MHz,  $\text{CDCl}_3$ ):  $\delta = 8.82$  (br s, 1H), 7.60 (d, 2H,  
23  $J = 8.2$  Hz), 7.55 (d, 1H,  $J = 8.2$  Hz), 7.37 (br s, 1H), 7.22 (m, 2H), 6.94 (s, 1H), 6.74 (m, 1H)  
24 ppm;  $^{13}\text{C}$  NMR (125 MHz,  $\text{CDCl}_3$ ):  $\delta = 150.2, 139.8, 134.1, 132.0$  (q,  $J_{\text{C-F}} = 33.0$  Hz), 131.6 (q,  $J_{\text{C-F}}$   
25  $= 32.5$  Hz), 129.5, 128.6, 125.6 (q,  $J_{\text{C-F}} = 3.7$  Hz), 124.0, 123.7 (q,  $J_{\text{C-F}} = 272.2$  Hz), 123.5 (q,  $J_{\text{C-F}}$   
26  $= 272.2$  Hz), 119.7 (q,  $J_{\text{C-F}} = 3.7$  Hz), 117.6 (q,  $J_{\text{C-F}} = 3.7$  Hz) ppm; LC/MS:  $m/z$  (%):  $[\text{M}+\text{H}]^+$   
27 348.70 (100 %),  $t_{\text{R}} = 12.11$  min, 96.8 % pure (UV).

28 **3-chloro-N-(3-methoxyphenyl)benzamide (22a)** white solid, m.p. 104 – 106 °C; 74 % yield;  $^1\text{H}$   
29 NMR (500 MHz, DMSO- $d_6$ ):  $\delta = 10.31$  (br s, 1H), 8.00 (dd, 1H,  $J = 1.9, 1.6$  Hz), 7.90 (m, 1H),  
30 7.66 (m, 1H), 7.57 (dd, 1H,  $J = 7.9, 7.9$  Hz), 7.45 (dd, 1H,  $J = 2.5, 2.2$  Hz), 7.36 (m, 1H), 7.26

1 (dd, 1H,  $J = 8.2, 7.9$  Hz), 6.70 (m, 1H), 3.76 (s, 3H) ppm; LC/MS:  $m/z$  (%):  $[M+H]^+$  262.80 (100  
2 %),  $t_R = 11.29$  min, 98.3 % pure (UV).

3 **3-chloro-N'-hydroxy-N-(3-methoxyphenyl)benzimidamide (22)** white solid, m.p. 135 – 137 °C;  
4 55 % yield;  $^1H$  NMR (500 MHz,  $CDCl_3$ ):  $\delta = 8.11$  (br s, 1H), 7.50 (dd, 1H,  $J = 2.2, 1.6$  Hz), 7.34  
5 (m, 1H), 7.29 (ddd, 1H,  $J = 7.9, 1.6, 1.3$  Hz), 7.23 (dd, 1H,  $J = 7.9, 7.9$  Hz), 7.21 (br s, 1H), 7.03  
6 (dd, 1H,  $J = 8.2, 7.9$  Hz), 6.50 (m, 1H), 6.26 (m, 1H), 6.23 (dd, 1H,  $J = 2.2, 2.2$  Hz), 3.63 (s, 3H)  
7 ppm;  $^{13}C$  NMR (125 MHz,  $CDCl_3$ ):  $\delta = 154.8, 145.6, 135.3, 129.2, 127.9, 124.6, 124.40, 124.39,$   
8  $123.0, 121.3, 108.5, 103.5, 101.9, 49.9$  ppm; LC/MS:  $m/z$  (%):  $[M+H]^+$  277.80 (100 %),  $t_R = 10.39$   
9 min, 98.3 % pure (UV).

10 **3-chloro-N-(3-chlorophenyl)benzamide (23a)** white solid, m.p. 118 – 120 °C; 83 % yield;  $^1H$   
11 NMR (500 MHz,  $DMSO-d_6$ ):  $\delta = 10.49$  (br s, 1H), 8.00 (dd, 1H,  $J = 1.9, 1.6$  Hz), 7.95 (dd, 1H,  $J$   
12  $= 1.9, 1.9$  Hz), 7.91 (m, 1H), 7.69 (m, 1H), 7.58 (dd, 1H,  $J = 8.2, 7.6$  Hz), 7.39 (dd, 1H,  $J = 8.2,$   
13  $8.2$  Hz), 7.18 (m, 1H), 6.70 (m, 1H) ppm; LC/MS:  $m/z$  (%):  $[M+ MeCN]^+$  306.57 (100 %),  $t_R =$   
14  $13.49$  min, 99.2 % pure (UV).

15 **3-chloro-N-(3-chlorophenyl)-N'-hydroxybenzimidamide (23)** white solid, m.p. 127 – 129 °C;  
16 56 % yield;  $^1H$  NMR (500 MHz,  $CDCl_3$ ):  $\delta = 8.62$  (br s, 1H), 7.49 (m, 1H), 7.37 (m, 1H), 7.27 (m,  
17 3H), 7.03 (dd, 1H,  $J = 8.2, 8.2$  Hz), 6.93 (m, 1H), 6.73 (dd, 1H,  $J = 2.2, 1.9$  Hz), 6.48 (m, 1H)  
18 ppm;  $^{13}C$  NMR (125 MHz,  $CDCl_3$ ):  $\delta = 150.3, 140.6, 134.6, 132.5, 130.1, 129.8, 128.2, 126.5,$   
19  $123.1, 121.0, 119.2$  ppm; LC/MS:  $m/z$  (%):  $[M+H]^+$  281.80 (100 %),  $t_R = 12.38$  min, 98.9 % pure  
20 (UV).

21 **N-(4-chlorophenyl)-3-cyanobenzamide (24a)** white solid, m.p. 206 – 208 °C; 68 % yield;  $^1H$   
22 NMR (500 MHz,  $DMSO-d_6$ ):  $\delta = 10.53$  (br s, 1H), 8.39 (dd, 1H,  $J = 1.9, 3$  Hz), 8.24 (m, 1H),  
23 8.07 (m, 1H), 7.80 (d, 2H,  $J = 9.1$  Hz), 7.76 (dd, 1H,  $J = 8.5, 7.9$  Hz), 7.43 (d, 2H,  $J = 9.1$  Hz)  
24 ppm; LC/MS:  $m/z$  (%):  $[M+ MeCN]^+$  297.85 (100 %),  $t_R = 10.86$  min, 100 % pure (UV).

25 **N-(4-chlorophenyl)-3-cyano-N'-hydroxybenzimidamide (24)** white solid, m.p. 164 – 166 °C;  
26 39 % yield;  $^1H$  NMR (500 MHz,  $DMSO-d_6$ ):  $\delta = 10.92$  (br s, 1H), 8.65 (br s, 1H), 7.84 (ddd, 1H,  $J$   
27  $= 7.9, 1.6, 1.3$  Hz), 7.80 (dd, 1H,  $J = 1.6, 1.3$  Hz), 7.62 (ddd, 1H,  $J = 8.3, 1.6, 1.6$  Hz), 7.54 (dd,  
28 1H,  $J = 8.3, 7.9$  Hz), 7.13 (d, 2H,  $J = 8.8$  Hz), 6.65 (d, 2H,  $J = 8.8$  Hz) ppm;  $^{13}C$  NMR (125 MHz,  
29  $DMSO-d_6$ ):  $\delta = 147.1, 140.0, 133.9, 132.6, 132.3, 131.0, 129.6, 128.2, 124.7, 121.3, 118.4, 111.5$   
30 ppm; LC/MS:  $m/z$  (%):  $[M+H]^+$  272.82 (100 %),  $t_R = 10.18$  min, 97.5 % pure (UV).

1 **4-methoxy-N-(4-(trifluoromethyl)phenyl)benzamide (25a)** white solid, m.p. 226 – 228 °C; 71  
2 % yield; <sup>1</sup>H NMR (500 MHz, DMSO-d<sub>6</sub>): δ= 10.41 (br s, 1H), 7.99 (m, 4H), 7.70 (d, 2H, *J* = 8.7  
3 Hz), 7.08 (d, 2H, *J* = 8.7 Hz), 3.85 (s, 3H) ppm; LC/MS: *m/z* (%): [M+H]<sup>+</sup> 295.83 (100 %), t<sub>R</sub>=  
4 11.89 min, 100 % pure (UV).

5 **N'-hydroxy-4-methoxy-N-(4-(trifluoromethyl)phenyl)benzimidamide (25)** white solid, m.p.  
6 139 – 141 °C; 41 % yield; <sup>1</sup>H NMR (500 MHz, DMSO-d<sub>6</sub>): δ= 10.70 (br s, 1H), 8.74 (br s, 1H),  
7 7.40 (d, 2H, *J* = 8.6 Hz), 7.35 (d, 2H, *J* = 9.1 Hz), 6.93 (d, 2H, *J* = 9.1 Hz), 6.76 (d, 2H, *J* = 8.6  
8 Hz), 3.76 (s, 3H) ppm; <sup>13</sup>C NMR (125 MHz, DMSO-d<sub>6</sub>): δ= 165.2, 162.1, 142.9, 129.7, 126.7,  
9 125.7 (q, *J*<sub>C-F</sub> = 3.6 Hz), 125.2, 124.3 (q, *J*<sub>C-F</sub> = 271.3 Hz), 123.2 (q, *J*<sub>C-F</sub> = 32.1 Hz), 119.9, 55.4  
10 ppm; LC/MS: *m/z* (%): [M+H]<sup>+</sup> 311.04 (100 %), t<sub>R</sub> = 10.33 min, 99.0 % pure (UV).

11 **N-phenyl-3-(trifluoromethyl)benzamide (26a)** white solid, m.p. 145 – 147 °C; 87 % yield; <sup>1</sup>H  
12 NMR (500 MHz, DMSO-d<sub>6</sub>): δ= 10.46 (br s, 1H), 8.30 (s, 1H), 8.26 (d, 1H, *J* = 8.2 Hz), 7.97 (d,  
13 1H, *J* = 7.6 Hz), 7.78 (m, 3H), 7.38 (dd, 2H, *J* = 8.5, 7.6 Hz), 6.75 (t, 1H, *J* = 7.6 Hz) ppm; <sup>13</sup>C  
14 NMR (125 MHz, DMSO-d<sub>6</sub>): δ= 164.0, 138.8, 135.8, 131.8, 129.7, 129.1 (q, *J*<sub>C-F</sub> = 32.1 Hz),  
15 128.6, 128.1 (q, *J*<sub>C-F</sub> = 3.7 Hz), 124.2 (q, *J*<sub>C-F</sub> = 3.7 Hz), 124.0, 123.9 (q, *J*<sub>C-F</sub> = 273.1 Hz), 120.5  
16 ppm; LC/MS: *m/z* (%): [M+H]<sup>+</sup> 265.91 (100 %), t<sub>R</sub> = 11.65 min, 100 % pure (UV).

17 **N'-methoxy-N-phenyl-3-(trifluoromethyl)benzimidamide (26)** colorless oil; 62 % yield; <sup>1</sup>H  
18 NMR (500 MHz, CDCl<sub>3</sub>): δ= 7.76 (s, 1H), 7.59 (d, 1H, *J* = 7.6 Hz), 7.56 (d, 1H, *J* = 7.9 Hz), 7.39  
19 (dd, 1H, *J* = 7.9, 7.6 Hz), 7.17 (br s, 1H), 7.12 (t, 2H, *J* = 7.9, 7.6 Hz), 6.95 (t, 1H, *J* = 7.6 Hz),  
20 6.65 (d, 2H, *J* = 7.9 Hz), 4.00 (s, 3H) ppm; <sup>13</sup>C NMR (125 MHz, CDCl<sub>3</sub>): δ= 149.8, 139.3, 132.1,  
21 131.7, 131.0 (q, *J*<sub>C-F</sub> = 32.1 Hz), 128.9, 128.8, 126.2 (q, *J*<sub>C-F</sub> = 3.7 Hz), 125.2 (q, *J*<sub>C-F</sub> = 3.7 Hz),  
22 123.7 (q, *J*<sub>C-F</sub> = 272.2 Hz), 123.2, 121.5, 61.9 ppm; LC/MS: *m/z* (%): [M+H]<sup>+</sup> 294.86 (100 %), t<sub>R</sub>=  
23 10.39 min, 96.9 % pure (UV).

24 **N-phenyl-3-(trifluoromethyl)benzohydrazonamide (27)** white solid, m.p. 143 – 145 °C; 23 %  
25 yield; <sup>1</sup>H NMR (500 MHz, DMSO-d<sub>6</sub>): δ= 7.72 (m, 2H), 7.40 (m, 5H), 7.26 (dd, 2H, *J* = 7.6, 7.6  
26 Hz), 7.14 (t, 1H, *J* = 7.6 Hz), 6.98 (d, 2H, *J* = 7.6 Hz) ppm; <sup>13</sup>C NMR (125 MHz, DMSO-d<sub>6</sub>): δ=  
27 153.8, 147.6, 134.7, 132.8, 130.8, 130.6, 130.4, 129.7 (q, *J*<sub>C-F</sub> = 31.2 Hz), 128.8, 128.2, 126.9 (q,  
28 *J*<sub>C-F</sub> = 3.2 Hz), 125.2 (q, *J*<sub>C-F</sub> = 4.3 Hz), 124.1 (q, *J*<sub>C-F</sub> = 272.4 Hz) ppm; LC/MS: *m/z* (%): [M+H]<sup>+</sup>  
29 279.93 (100 %), t<sub>R</sub> = 6.74 min, 94.0 % pure (UV). This unsealed compound turns red and forms  
30 dimer ( the mixture analyzed by LC/MS) after days under room temperature.

1 **Synthesis of 2-amino-1-(3-(trifluoromethyl)phenyl)ethanone hydrochloride (28a)** (4). To a  
2 stirred solution of 3-(trifluoromethyl) acetophenone (5.20 g, 27.6 mmol) in CH<sub>2</sub>Cl<sub>2</sub> (80 mL) at 0  
3 °C was carefully added a solution of bromine (4.40 g, 27.6 mmol) in CH<sub>2</sub>Cl<sub>2</sub> (75 mL). The  
4 reaction was warmed to room temperature and stirred for 1.5 h. The solvent was reduced under  
5 reduced pressure and the after the addition was completed and then crude α-bromoketone was  
6 used without further purification. The α-bromoketone was dissolved in CCl<sub>4</sub> (100 mL),  
7 hexamethylenetetramine (4.20 g, 30.7 mmol) was added. The mixture was stirred overnight, the  
8 precipitate was filtered and washed with CCl<sub>4</sub> (2 x 40 mL). The white solid (ca. 9.2 g) was treated  
9 with EtOH (150 mL) and concentrated HCl (21 mL) and stirred for 16 h. The mixture was filtered  
10 and the precipitate was washed with EtOH (2 x 50 mL). The filtrate was concentrated and the  
11 residue was crystallized from 4M HCl. The amino hydrochloride **28a** was obtained as colorless  
12 needles. Yield: 57 %. <sup>1</sup>H NMR (500 MHz, DMSO-d<sub>6</sub>): δ= 8.65 (br s, 3H, NH<sub>3</sub>), 8.32 (m, 1H),  
13 8.29 (dd, 1H, *J* = 2.0, 2.0 Hz), 8.09 (m, 1H), 7.84 (dd, 1H, *J* = 7.9, 7.9 Hz), 4.69 (s, 2 H, CH<sub>2</sub>)  
14 ppm. <sup>13</sup>C NMR (500 MHz, d<sub>6</sub>-DMSO): δ= 192.3 (C=O), 134.5, 132.2, 130.7 (q, *J*<sub>C-F</sub> = 3.7 Hz),  
15 130.4, 129.7 (q, *J*<sub>C-F</sub> = 32.1 Hz), 124.7 (q, *J*<sub>C-F</sub> = 3.7 Hz), 123.7 (q, *J*<sub>C-F</sub> = 272.2 Hz), 45.0 ppm.

16 **Synthesis of 1-phenyl-5-(3-(trifluoromethyl)phenyl)-1H-imidazole-2(3H)-thione (28)** (5). A  
17 mixture of the amino hydrochloridebromide **28a** (1.00 g, 3.38 mmol), phenylisothiocyanate (440  
18 mg, 3.38 mmol) and triethylamine (342 mg, 3.38 mmol) in EtOH (10 mL) was refluxed in a  
19 sealed tube for 2 h. The clear solution was cooled to room temperature and the precipitate was  
20 filtered and washed with EtOH (2 x 5 mL). The 4-imidazoline-2-thione **28** was obtained as  
21 colorless crystals. Yield: 72%; m.p. 125.3 – 128.4 °C; <sup>1</sup>H NMR (500 MHz, DMSO-d<sub>6</sub>): δ= 12.70  
22 (br s, 1H), 7.56 (d, 1H, *J* = 7.3 Hz), 7.55 (s, 1H), 7.44 (m, 4H), 7.38 (d, 1H, *J* = 7.9 Hz), 7.26 (m,  
23 3H) ppm; <sup>13</sup>C NMR (125 MHz, DMSO-d<sub>6</sub>): δ= 164.4, 136.4, 131.1, 129.5, 129.4, 129.3, 129.1 (q,  
24 *J*<sub>C-F</sub> = 31.6 Hz), 129.0, 128.9, 128.6, 124.1 (q, *J*<sub>C-F</sub> = 3.7 Hz), 123.7 (q, *J*<sub>C-F</sub> = 272.2 Hz), 123.5 (q,  
25 *J*<sub>C-F</sub> = 4.6 Hz), 115.0 ppm; LC/MS: *m/z* (%): [M+H]<sup>+</sup> 321.05 (100 %), *t<sub>R</sub>* = 10.94 min, 98.4 %  
26 pure (UV).

27 **Synthesis of 3-(trifluoromethyl)benzohydrazide (29a)**. A mixture of 3-  
28 (trifluoromethyl)benzoyl chloride (4.75 g, 22.8 mmol) and hydrazine hydrat (4.56 g, 91.2 mmol)  
29 in EtOH (15 mL) was refluxed overnight and cooled to room temperature. The clear solution was  
30 decanted from the oily residue and poured into ice water. The precipitate was filtered and washed  
31 with water (2 x 20 mL). The solid was dissolved in EtOAc (40 mL) washed with saturated NaCl

1 (2 x 30 mL), dried over MgSO<sub>4</sub> and concentrated. The crude material (3.30 g) was crystallized  
2 from benzene/*n*-hexane (2:1, 120 mL) and washed with *n*-hexane (2 x 20 mL). The hydrazide **29a**  
3 was obtained as a colorless solid. Yield: 3.05 g, 66 %; <sup>1</sup>H NMR (500 MHz, DMSO-*d*<sub>6</sub>): δ= 10.04  
4 (br s, 1H, CONH), 8.15 (dd, 1H, *J* = 2.0, 2.0 Hz), 8.11 (m, 1H), 7.88 (m, 1H), 7.71 (dd, 1H, *J* =  
5 7.9, 7.9 Hz), 4.58 (br s, 2H, NH<sub>2</sub>) ppm. <sup>13</sup>C NMR: δ= 164.2 (CONH), 134.2, 131.0, 129.6, 129.2  
6 (q, *J*<sub>C-F</sub> = 32.1 Hz), 127.6 (q, *J*<sub>C-F</sub> = 3.7 Hz), 123.9 (q, *J*<sub>C-F</sub> = 272.2 Hz), 123.6 (q, *J*<sub>C-F</sub> = 3.7 Hz)  
7 ppm.

8 **Synthesis of N-phenyl-2-(3-(trifluoromethyl)benzoyl)hydrazinecarbothioamide (29b).** A  
9 mixture of 3-trifluoromethyl benzoic acid hydrazide (714 mg, 3.50 mmol) and  
10 phenylisothiocyanate (473 mg, 3.50 mmol) in EtOH (5 mL) was refluxed for 2 h. The solution  
11 was cooled to room temperature, the precipitate was filtered and washed with Et<sub>2</sub>O (2 x 10 mL).  
12 The thiosemicarbazide **29b** was obtained as a white solid. Yield: 550 mg, 46 %; <sup>1</sup>H NMR (500  
13 MHz, DMSO-*d*<sub>6</sub>): δ= 10.82 (br s, 1H, NH), 9.86 (br s, 1H, NH), 9.78 (br s, 1H, NH), 8.30 (dd,  
14 1H, *J* = 2.0, 2.0 Hz), 8.24 (m, 1H), 7.97 (m, 1H), 7.77 (dd, 1H, *J* = 7.8, 7.8 Hz), 7.43 (m, 2H),  
15 7.34 (m, 2H), 7.17 (m, 1 H) ppm; <sup>13</sup>C NMR (125 MHz, DMSO-*d*<sub>6</sub>): δ= 181.1 (C=S), 164.7 (C=O),  
16 139.1, 133.5, 131.9, 129.6, 129.0 (q, *J*<sub>C-F</sub> = 32.1 Hz), 128.3 (q, *J*<sub>C-F</sub> = 2.8 Hz), 128.0 (q, *J*<sub>C-F</sub> = 2.8  
17 Hz), 126.2, 125.2, 124.5, 123.9 (q, *J*<sub>C-F</sub> = 272.2 Hz) ppm.

18 **Synthesis of 4-phenyl-3-(3-(trifluoromethyl)phenyl)-1H-1,2,4-triazole-5(4H)-thione (29) (6).**  
19 The semicarbazid **29b** (300 mg, 0.88 mmol) was suspended in an aqueous solution of NaOH (5  
20 wt%, 15 mL) and heated under reflux. After the solid was completely dissolved the pale yellow  
21 solution was stirred for 2 h. The solution was cooled to 0 °C and acidified with 2M HCl. The  
22 precipitate was filtered, washed with water (3 x 30 mL) and air-dried. The crude material was  
23 crystallized from *n*-hexane/EtOH (2:1). **29** was obtained as colorless needles, m.p. 155.3 – 156.7  
24 °C; 65 % yield; <sup>1</sup>H NMR (500 MHz, DMSO-*d*<sub>6</sub>): δ= 14.25 (br s, 1H), 7.78 (d, 1H, *J* = 7.6 Hz),  
25 7.65 (d, 1H, *J* = 7.9 Hz), 7.60 (dd, 1H, *J* = 7.9, 7.6 Hz), 7.51 (m, 4H), 7.40 (m, 2H) ppm; <sup>13</sup>C  
26 NMR (125 MHz, DMSO-*d*<sub>6</sub>): δ= 168.8, 149.2, 134.2, 132.2, 129.8, 129.6, 129.4, 129.1 (q, *J*<sub>C-F</sub> =  
27 32.1 Hz), 128.7, 126.9 (q, *J*<sub>C-F</sub> = 3.7 Hz), 126.8, 124.7 (q, *J*<sub>C-F</sub> = 3.7 Hz), 123.5 (q, *J*<sub>C-F</sub> = 272.2 Hz)  
28 ppm; LC/MS: *m/z* (%): [M+H]<sup>+</sup> 322.05 (100 %), *t<sub>R</sub>* = 11.11 min, 98.3 % pure (UV).

29 **Synthesis of N-(3-(trifluoromethyl)benzylidene)aniline (30a).** A solution of 3-  
30 (trifluoromethyl)benzaldehyde (4.85 g, 27.9 mmol) and aniline (2.76 g, 27.9 mmol) in EtOH (30  
31 mL) was refluxed for 2 h. The solution was cooled to room temperature and the solvent was

1 removed under reduced pressure. The imine **30a** was obtained as yellow oil and used in the next  
2 step without further purification. <sup>1</sup>H NMR (500 MHz, CDCl<sub>3</sub>): δ= 8.42 (s, 1H, CHN), 8.12 (dd, *J*  
3 = 2.0, 2.0 Hz, 1H), 8.01 (m, 1H), 7.66 (m, 1H), 7.52 (dd, *J* = 7.7, 7.7 Hz, 1H), 7.34 (m, 2H),  
4 7.21–7.14 (m, 3 H) ppm; <sup>13</sup>C NMR (125 MHz, CDCl<sub>3</sub>): δ= 158.4 (CHN), 151.4, 136.9, 131.9,  
5 131.4 (q, *J*<sub>C-F</sub> = 32.8 Hz), 129.3, 129.2, 127.7 (q, *J*<sub>C-F</sub> = 3.7 Hz), 126.5, 125.4 (q, *J*<sub>C-F</sub> = 3.7 Hz),  
6 123.9 (q, *J*<sub>C-F</sub> = 272.0 Hz), 120.8 ppm.

7 **Synthesis of 1-phenyl-5-(3-(trifluoromethyl)phenyl)-1H-imidazole (30)** (7). To a solution of  
8 the imine **30a** (1.54 g, 6.18 mmol) in MeOH (30 mL) and DME (15 mL) was added K<sub>2</sub>CO<sub>3</sub> (4.15  
9 g, 13.0 mmol) and *p*-toluenesulfonylmethylisocyanide (1.45 g, 7.42 mmol). The reaction mixture  
10 was refluxed for 6 h. After cooling to room temperature, the solvent was removed under reduced  
11 pressure, and the residue was partitioned between EtOAc (50 mL) and saturated NaCl (50 mL).  
12 The organic layer was washed with saturated NaCl (2 x 30 mL), dried over MgSO<sub>4</sub> and  
13 concentrated. The crude material was purified by flash chromatography (SiO<sub>2</sub>, *n*-hexane / EtOAc  
14 2:1→1:1). The imidazole **30** was obtained as a pale yellow solid, m.p. 110.8 – 111.7 °C; 65 %  
15 yield; <sup>1</sup>H NMR (500 MHz, DMSO-*d*<sub>6</sub>): δ= 8.07 (d, 1H, *J* = 1.0 Hz), 7.60 (d, 1H, *J* = 7.6 Hz), 7.53  
16 (dd, 1H, *J* = 7.9, 7.6 Hz), 7.48 (m, 5H), 7.39 (s, 1H), 7.30 (m, 2H) ppm; <sup>13</sup>C NMR (125 MHz,  
17 DMSO-*d*<sub>6</sub>): δ= 140.2, 135.9, 131.3, 130.6, 130.2, 129.6, 129.5, 129.1 (q, *J*<sub>C-F</sub> = 32.1 Hz), 128.4,  
18 125.8, 123.8 (q, *J*<sub>C-F</sub> = 273.1 Hz), 123.7 (q, *J*<sub>C-F</sub> = 3.7 Hz), 123.6 (q, *J*<sub>C-F</sub> = 3.7 Hz) ppm; LC/MS:  
19 *m/z* (%): [M+H]<sup>+</sup> 288.90 (100 %), *t*<sub>R</sub> = 12.59 min, 98.2 % pure (UV).

20 **Validation of iron chelating property. 1) Color test with iron (III) chloride:** All compounds  
21 were dissolved as 0.01 M solution in ethanol and FeCl<sub>3</sub> was prepared as 0.01 M solution in water.  
22 The same volume of ethanolic solutions were mixed up with ferric chloride solution and taken  
23 same amount of ethanol as a blank control (8).

24 **2) Determine the complex stability constants:** The experiment was performed by  
25 potentiometric titration. Thereby, it was uncovered that already under acidic conditions (pH = 4)  
26 the formation of Fe(OH)<sub>3</sub> was observed indicating that the CBR compounds cannot form stable  
27 Fe(III) complexes under biological conditions (Data supplied by Professor Hegetschweiler's  
28 group).

29  
30  
31

1 **Biology.**

2 **Transcription Inhibition Assay.** The transcription inhibition experiments were performed as  
3 described earlier (9, 10). Purification and quantification of transcripts as well as the determination  
4 of IC<sub>50</sub> values was performed as described by Hauptenthal and colleagues (11).

5 **Minimal inhibitory concentration (MIC) determinations.** MIC values for *E. coli TolC* were  
6 determined for all compounds. Selected compounds were tested in *E. coli K12*, *Bacillus subtilis*  
7 *subsp. subtilis*, *Pseudomonas aeruginosa PAOI* and *Staphylococcus aureus subsp. aureus*  
8 (*Newman strain*). As a bacteria start OD<sub>600</sub> we used 0.03 in a total volume of 200 µL in lysogeny  
9 broth (LB) containing the compounds predissolved in DMSO (maximal DMSO concentration in  
10 the experiment: 1 %). Final compound concentrations prepared from serial dilutions ranged from  
11 0.02 to 100 µg/mL (double values for each concentration) and were adapted for each compound  
12 depending on their antibacterial activity and the observation of compound precipitation in the  
13 growth medium. The ODs were determined after addition of the compounds and again after  
14 incubation for 16 h at 37 °C and 50 rpm (200 rpm for *PAOI*) in 96 well plates (Sarstedt,  
15 Nümbrecht, Germany) using a PolarStar Omega (BMG labtech, Ortenberg, Germany). Given  
16 MIC values are means of two independent determinations (three if MIC < 10 µg/mL). They are  
17 defined as the lowest concentration of compounds that reduced OD<sub>600</sub> by ≥ 95 % and were read  
18 off the inhibition curves. Standard deviation was less than 25 % (most cases: < 15 %).

19 **Influence of iron (III) on the antibacterial activity of CBR703.** The effect of DMSO,  
20 deferoxamine mesylate (DFO) (25 µg/mL) and CBR703 (3 µg/mL) on the growth of *E. coli TolC*  
21 was determined after 16 h (growth conditions as described in the MIC determinations section) by  
22 OD<sub>600</sub> measurement in a PolarStar Omega. The experiment was performed in parallel either in  
23 presence or absence of 250 µM Fe (III) citrate. The DMSO concentration was kept at 1 % for all  
24 samples.

25 **Cytotoxicity assay.** HEK 293 cells (2x10<sup>5</sup> cells per well) were seeded in 24-well, flat-bottomed  
26 plates. Culturing of cells, incubations and OD measurements were performed as described  
27 previously (12) with small modifications. 24 h after seeding the cells the incubation was started  
28 by the addition of compounds in a final DMSO concentration of 1 %. The living cell mass was  
29 determined after 24 and 72 h followed by the calculation of LD<sub>50</sub> values.



1 **Precipitation experiment.** CBR703 was diluted to different concentrations (0 – 400 µg/mL) in  
2 MHB in a total volume of 200 µL in a 96 well plate and a maximal DMSO concentration of 2 %.  
3 After 25 minutes the precipitation-derived turbidity was measured at 600 nm in a PolarStar  
4 Omega. The experiment was performed twice in quadruplicates.

5 **Microtiter plate biofilm tests.** 96-well biofilm assays were carried out in sterile clear flat bottom  
6 untreated microtiter plates (Nunc, Wiesbaden, Germany) in a volume of 100 µL. Aerobic  
7 overnight cultures were generated from a glycerol stock at 37 °C in 10 ml Medium T. Serial  
8 dilutions of the compounds with final concentrations from 7.3 to 400 µg/mL were added to a  
9 homogenized suspension of the clinical *S. aureus* isolate 11-02670 (MSSA ST30 strain) with an  
10 OD<sub>600</sub> of 0.2 (final OD<sub>600</sub> of 0.1). The plates were incubated for 17 h at 37 °C in a moist  
11 atmosphere. The optical density was determined at 600 nm. 20 µL of supernatant was removed  
12 with the pipetting robot Evolution P3 (PerkinElmer, Waltham, MA), transferred to a 396-well  
13 microtiter plate (Corning, Tewksbury, MA) and the optical density of planctonic bacteria was  
14 determined at 600 nm. Biofilm was quantified in the original 96-well plate by adding 10 µL of a  
15 solution of FITC in DMSO (1 mg/mL) to the wells followed by an incubation for 1 h. Planctonic  
16 bacteria were removed by three washes of 45, 30 and 15 min with 0.9 % NaCl. The washing was  
17 carried out by carefully submerging the plates in an upright orientation into the washing solution  
18 and slowly swirling the container at room temperature. The final wash contained 0.5 % peroxy  
19 acetic acid to decontaminate the plates before they were placed in the reader for fluorescence  
20 determination (excitation 485 nm, emission 535 nm).

21

## 22 REFERENCES

23

- 24 1. **Li L, Chen X, Fan P, Mihalic JT, Cutler ST.** 2001. Synthesis, antibacterial activity and RNA  
25 polymerase inhibition of phenylamidine derivs. PCT Int. Appl. WO 2001051456 A2 20010719.
- 26 2. **Krajete A, Steiner G, Kopacka H, Ongania KH, Wurst K, Kristen MO, Preishuber-Pflugl**  
27 **P, Bildstein B.** 2004. Iminohydroxamate early and late transition metal halide complexes-new  
28 precatalysts for aluminoxane-cocatalyzed olefin insertion polymerization. Eur. J. Inorg. Chem.  
29 **8**:1740–1752.
- 30 3. **Bellamy FD, Ou K.** 1984. Selective reduction of aromatic nitro compounds with stannous  
31 chloride in nonacidic and nonaqueous medium. Tetrahedron Lett. **25**:839–842.
- 32 4. (a) **Weintraub PM, Meyer DR, Aiman CE.** 1980. Evidence for 1, 2-dehydroadamantane as a  
33 gas-phase product in time-resolved field-ionization mass spectrometry of 2-adamantyl  
34 trifluoroacetate. J. Org. Chem. **45**:4990–4992; (b) **Martinet SJ, Larsen L, Street JD, Joule**

- 1 **JA.** 1988. Synthesis of 6-hydroxy-1,4-dimethylisoquinoline and of ethyl 7-hydroxy-6-  
2 methoxy-1-methylisoquinoline-3-carboxylate. *J. Chem. Soc., Perkin Trans. 1.* **7**:1705–1710;  
3 (c) **Shafik RM, Askar A-FAA.** 1979. New biphenyl derivatives. II: 1-(4-Biphenyl)-1-  
4 hydroxy-2-aminoethanes and 1-(4-biphenyl)-1-chloro-2-aminoethanes as potential  $\beta$ -  
5 adrenoceptor blocking agents. *J. Pharm. Sci.* **68**:776–780.
- 6 5. **Korohoda MJ, Bojarska AB.** 1991. Methylation of 4-imidazoline-2-thiones. *J. Prakt. Chem.*  
7 **333**:355–360.
- 8 6. **Plech T, Wujec M, Siwek A, Kosikowska U, Malm A.** 2011. Synthesis and antimicrobial  
9 activity of thiosemicarbazides, s-triazoles and their Mannich bases bearing 3-chlorophenyl  
10 moiety. *Eur. J. Med. Chem.* **46**:241–248.
- 11 7. **Almansa C, Alfón J, de Arriba AF, Cavalcant FL, Escamilla I, Gómez LA, Miralles A,**  
12 **Soliva R, Bartrolí J, Carceller E, Merlos M, García-Rafanell J.** 2003. Synthesis and  
13 Structure-Activity Relationship of a New Series of COX-2 Selective Inhibitors: 1,5-  
14 Diarylimidazoles. *J. Med. Chem.* **46**:3463–3475.
- 15 8. **Johnson JE, Carvallo C, Dolliver DD, Sanchez N, Garza V, Canseco DC, Eggleton GL,**  
16 **Fronczek FR.** 2007. Bisamidoximes: Synthesis and Complexation with Iron(III). *Aust. J.*  
17 *Chem.* **60**:685–690.
- 18 9. **Hinsberger S, Hüsecken K, Groh M, Negri M, Haupenthal J, Hartmann RW.**  
19 2013. Discovery of novel bacterial RNA polymerase inhibitors: pharmacophore-based  
20 virtual screening and hit optimization. *J. Med. Chem.* **56**:8332–8338.
- 21 10. **Sahner JH, Groh M, Negri M, Haupenthal J, Hartmann RW.** 2013. Novel small molecule  
22 inhibitors targeting the "switch region" of bacterial RNAP: structure-based optimization of a  
23 virtual screening hit. *Eur J Med Chem.* **65**:223–231.
- 24 11. **Haupenthal J, Hüsecken K, Negri M, Maurer CK, Hartmann RW.** 2012. Influence of  
25 DNA template choice on transcription and inhibition of *Escherichia coli* RNA polymerase.  
26 *Antimicrob. Agents Chemother.* **56**:4536–4539
- 27 12. **Haupenthal J, Baehr C, Zeuzem S, Piiper A.** 2007. RNase A-like enzymes in serum inhibit  
28 the anti-neoplastic activity of siRNA targeting polo-like kinase 1. *Int. J. Cancer.* **121**:206–210.
- 29  
30  
31  
32  
33  
34  
35  
36  
37  
38  
39  
40

1  
2  
3  
4  
5

## Supplementary Tables and Figures

### SCHEME S1 Synthesis of compounds 1 – 27.

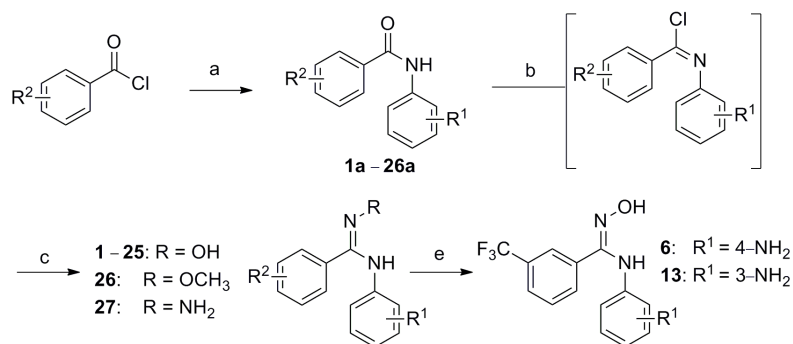

6

7 **Reagents and conditions:** (a) appropriate aniline, Et<sub>3</sub>N, CH<sub>2</sub>Cl<sub>2</sub>, 0 °C to r. t. for 2 h; (b) PCl<sub>5</sub>,  
 8 1,2-dichloroethane, 70 °C for 5 h; (c) RNH<sub>2</sub>·HCl, Et<sub>3</sub>N, acetonitrile, 0 °C to r. t., overnight; (d)  
 9 SnCl<sub>2</sub>·2H<sub>2</sub>O, EtOH, N<sub>2</sub>, 70 °C for 30 min.

10

### SCHEME S2 Synthesis of compound 28 – 30.

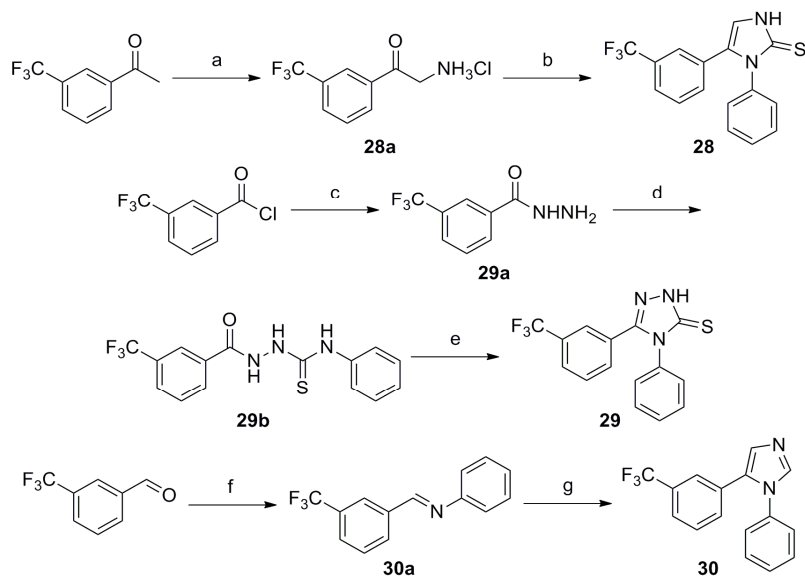

11

12 **Reagents and conditions:** (a) 1) Br<sub>2</sub>, CH<sub>2</sub>Cl<sub>2</sub>, 0 °C to r. t. 2) Hexamethylenetetramine, CCl<sub>4</sub>. 3)  
 13 HCl, EtOH, r. t. (b) PhNCS, NEt<sub>3</sub>, EtOH, reflux. (c) Hydrazine hydrate, EtOH, reflux. (d) PhNCS,  
 14 EtOH, reflux. (e) NaOH, H<sub>2</sub>O, reflux. (f) Aniline, EtOH, reflux. (g) TOSMIC, K<sub>2</sub>CO<sub>3</sub>, MeOH,  
 15 DME.

16

1

2

**TABLE S1** RNAP inhibition and antibacterial activities of derivatives of **CBR703**.

| Compound      | 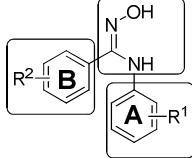 |                                        | % Inhibition of<br><i>E. coli</i> RNAP<br>(at 50 $\mu$ M) | MIC<br><i>E. coli</i> TolC<br>( $\mu$ g/mL) <sup>c</sup> |
|---------------|-----------------------------------------------------------------------------------|----------------------------------------|-----------------------------------------------------------|----------------------------------------------------------|
|               | R <sup>1</sup>                                                                    | R <sup>2</sup>                         |                                                           |                                                          |
| <b>CBR703</b> | H                                                                                 | 3-CF <sub>3</sub>                      | 18 $\mu$ M <sup>a</sup>                                   | 14                                                       |
| <b>1</b>      | 4-NO <sub>2</sub>                                                                 | 3-CF <sub>3</sub>                      | 16                                                        | >50                                                      |
| <b>2</b>      | 4-CH <sub>3</sub>                                                                 | 3-CF <sub>3</sub>                      | 26                                                        | 14                                                       |
| <b>3</b>      | 4-CF <sub>3</sub>                                                                 | 3-CF <sub>3</sub>                      | 18 <sup>b</sup>                                           | 8                                                        |
| <b>4</b>      | 4-CN                                                                              | 3-CF <sub>3</sub>                      | n. i.                                                     | >25                                                      |
| <b>5</b>      | 4-OCH <sub>3</sub>                                                                | 3-CF <sub>3</sub>                      | n. i.                                                     | >25                                                      |
| <b>6</b>      | 4-NH <sub>2</sub>                                                                 | 3-CF <sub>3</sub>                      | 10                                                        | >100                                                     |
| <b>7</b>      | 4-Cl                                                                              | 3-CF <sub>3</sub>                      | 35                                                        | 9                                                        |
| <b>8</b>      | 3-NO <sub>2</sub>                                                                 | 3-CF <sub>3</sub>                      | 12                                                        | >50                                                      |
| <b>9</b>      | 3-CH <sub>3</sub>                                                                 | 3-CF <sub>3</sub>                      | 24                                                        | 12                                                       |
| <b>10</b>     | 3-CF <sub>3</sub>                                                                 | 3-CF <sub>3</sub>                      | 15 <sup>b</sup>                                           | 22                                                       |
| <b>11</b>     | 3-CN                                                                              | 3-CF <sub>3</sub>                      | n. i.                                                     | 42                                                       |
| <b>12</b>     | 3-OCH <sub>3</sub>                                                                | 3-CF <sub>3</sub>                      | 12                                                        | 24                                                       |
| <b>13</b>     | 3-NH <sub>2</sub>                                                                 | 3-CF <sub>3</sub>                      | 10                                                        | >100                                                     |
| <b>14</b>     | H                                                                                 | 2-CF <sub>3</sub>                      | n. i.                                                     | >100                                                     |
| <b>15</b>     | H                                                                                 | 4-CF <sub>3</sub>                      | n. i.                                                     | 23                                                       |
| <b>16</b>     | H                                                                                 | 3-CN                                   | n. i.                                                     | >100                                                     |
| <b>17</b>     | H                                                                                 | 3-Cl                                   | 32                                                        | 41                                                       |
| <b>18</b>     | H                                                                                 | 3-CF <sub>3</sub> -, 4-NO <sub>2</sub> | 23 $\mu$ M <sup>a</sup>                                   | 20                                                       |
| <b>19</b>     | H                                                                                 | 3-CF <sub>3</sub> -, 4-F               | 19 $\mu$ M <sup>a</sup>                                   | 21                                                       |
| <b>20</b>     | H                                                                                 | 3-Cl-, 4-F                             | 34                                                        | 39                                                       |
| <b>21</b>     | 3-CF <sub>3</sub>                                                                 | 4-CF <sub>3</sub>                      | n. i.                                                     | 8                                                        |
| <b>22</b>     | 3-OCH <sub>3</sub>                                                                | 3-Cl                                   | 20                                                        | 45                                                       |
| <b>23</b>     | 3-Cl                                                                              | 3-Cl                                   | 25                                                        | 9                                                        |
| <b>24</b>     | 4-Cl                                                                              | 3-CN                                   | n. i.                                                     | 68                                                       |
| <b>25</b>     | 4-CF <sub>3</sub>                                                                 | 4-OCH <sub>3</sub>                     | n. i.                                                     | 15                                                       |

3 <sup>a</sup>: IC<sub>50</sub> value; <sup>b</sup>: Compound was tested at 20  $\mu$ M limited due to insufficient solubility of the  
 4 compounds; <sup>c</sup> >: MIC-determination was limited due to insufficient solubility of the compound;  
 5 n.i. = no inhibition (<10 % inhibition). The SD in these experiments was < 25 % (most cases: <  
 6 15 %).

7

8

9

10

1  
2  
3  
4

**TABLE S2** RNAP inhibition and antibacterial activities of derivatives of CBR703.

| Compound      | 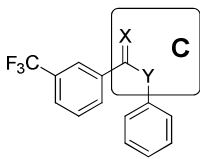   | % Inhibition of<br><i>E. coli</i> RNAP<br>(at 50 $\mu$ M) | MIC<br><i>E. coli</i> TolC<br>( $\mu$ g/mL) <sup>b</sup> |
|---------------|-------------------------------------------------------------------------------------|-----------------------------------------------------------|----------------------------------------------------------|
| <b>CBR703</b> |    | 18 $\mu$ M <sup>a</sup>                                   | 14                                                       |
| <b>26</b>     |    | 29                                                        | 24                                                       |
| <b>27</b>     |   | n.i.                                                      | 23                                                       |
| <b>28</b>     |  | n.i.                                                      | >50                                                      |
| <b>29</b>     |  | n.i.                                                      | >50                                                      |
| <b>30</b>     |  | n.i.                                                      | >25                                                      |

<sup>a</sup>: IC<sub>50</sub> value; <sup>b</sup> >: MIC-determination was limited due to insufficient solubility of the compound; n.i. = no inhibition (<10 % inhibition). The SD in these experiments was < 25 % (most cases: < 15 %).

5  
6  
7  
8  
9  
10  
11  
12  
13  
14

1  
2  
3

**TABLE S3** Biological activities of synthetic intermediates.

| Compound   | 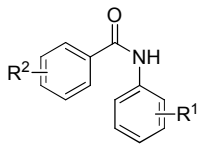 |                                        | % Inhibition of<br><i>E. coli</i> RNAP<br>(at 50 μM) | MIC<br><i>E. coli TolC</i><br>(μg/mL) <sup>a</sup> |
|------------|-----------------------------------------------------------------------------------|----------------------------------------|------------------------------------------------------|----------------------------------------------------|
|            | R <sup>1</sup>                                                                    | R <sup>2</sup>                         |                                                      |                                                    |
| <b>1a</b>  | 4-NO <sub>2</sub>                                                                 | 3-CF <sub>3</sub>                      | n. i.                                                | >100                                               |
| <b>2a</b>  | 4-CH <sub>3</sub>                                                                 | 3-CF <sub>3</sub>                      | n. i.                                                | >25                                                |
| <b>3a</b>  | 4-CF <sub>3</sub>                                                                 | 3-CF <sub>3</sub>                      | n. i.                                                | 2                                                  |
| <b>4a</b>  | 4-CN                                                                              | 3-CF <sub>3</sub>                      | n. i.                                                | >25                                                |
| <b>5a</b>  | 4-OCH <sub>3</sub>                                                                | 3-CF <sub>3</sub>                      | n. i.                                                | >25                                                |
| <b>7a</b>  | 4-Cl                                                                              | 3-CF <sub>3</sub>                      | n. i.                                                | 7                                                  |
| <b>8a</b>  | 3-NO <sub>2</sub>                                                                 | 3-CF <sub>3</sub>                      | n. i.                                                | >25                                                |
| <b>9a</b>  | 3-CH <sub>3</sub>                                                                 | 3-CF <sub>3</sub>                      | n. i.                                                | >25                                                |
| <b>10a</b> | 3-CF <sub>3</sub>                                                                 | 3-CF <sub>3</sub>                      | n. i.                                                | 4                                                  |
| <b>11a</b> | 3-CN                                                                              | 3-CF <sub>3</sub>                      | n. i.                                                | 24                                                 |
| <b>12a</b> | 3-OCH <sub>3</sub>                                                                | 3-CF <sub>3</sub>                      | n. i.                                                | 28                                                 |
| <b>14a</b> | H                                                                                 | 2-CF <sub>3</sub>                      | n. i.                                                | >25                                                |
| <b>15a</b> | H                                                                                 | 4-CF <sub>3</sub>                      | n. i.                                                | 23                                                 |
| <b>16a</b> | H                                                                                 | 3-CN                                   | n. i.                                                | >25                                                |
| <b>17a</b> | H                                                                                 | 3-Cl                                   | n. i.                                                | >25                                                |
| <b>18a</b> | H                                                                                 | 3-CF <sub>3</sub> -, 4-NO <sub>2</sub> | n. i.                                                | >25                                                |
| <b>19a</b> | H                                                                                 | 3-CF <sub>3</sub> -, 4-F               | n. i.                                                | >50                                                |
| <b>20a</b> | H                                                                                 | 3-Cl-, 4-F                             | n. i.                                                | >25                                                |
| <b>21a</b> | 3-CF <sub>3</sub>                                                                 | 4-CF <sub>3</sub>                      | n. i.                                                | 3                                                  |
| <b>22a</b> | 3-OCH <sub>3</sub>                                                                | 3-Cl                                   | n. i.                                                | >25                                                |
| <b>23a</b> | 3-Cl                                                                              | 3-Cl                                   | n. i.                                                | 7                                                  |
| <b>24a</b> | 4-Cl                                                                              | 3-CN                                   | n. i.                                                | >25                                                |
| <b>25a</b> | 4-CF <sub>3</sub>                                                                 | 4-OCH <sub>3</sub>                     | n. i.                                                | >25                                                |
| <b>26a</b> | H                                                                                 | 3-CF <sub>3</sub>                      | n. i.                                                | >25                                                |

4 <sup>a</sup> >: MIC-determination was limited due to insufficient solubility of the compound; n.i. = no  
5 inhibition (<10 % inhibition). The SD in these experiments was < 25 % (most cases: < 15 %).

6  
7  
8  
9  
10  
11  
12

1  
2  
3  
4  
5

**TABLE S4** Inhibition of *E.coli TolC* growth in absence or presence of FCS.

| Compound      | <i>E. coli TolC</i> MIC ( $\mu\text{g/mL}$ ) <sup>a</sup> |               |
|---------------|-----------------------------------------------------------|---------------|
|               | LB                                                        | LB + 10 % FCS |
| <b>CBR703</b> | 14                                                        | >25           |
| <b>7</b>      | 9                                                         | >25           |
| <b>19</b>     | 21                                                        | 50            |
| <b>26</b>     | 24                                                        | >25           |
| <b>3a</b>     | 2                                                         | 14            |

6 The antibacterial activity of the tested compounds was abolished or drastically reduced by  
7 addition of FCS, which suggested the cytotoxicities of our compounds are even more pronounced  
8 in the absence of serum. FCS: Fetal calf serum; <sup>a</sup> >: MIC-determination was limited due to  
9 insufficient solubility of the compound. The SD in these experiments was < 25 % (most cases: <  
10 15 %).

11  
12

**TABLE S5** Color test with iron (III) chloride.

| compound      | Color change reaction with Fe (III) |
|---------------|-------------------------------------|
| <b>CBR703</b> | positive                            |
| <b>26</b>     | negative                            |

13 For **CBR703** bearing an amidoxime moiety we observed a color variation (positive effect). In  
14 contrast the esterified **26** lacking a color change indicated that the free hydroxyl group was  
15 necessary to form complexes.

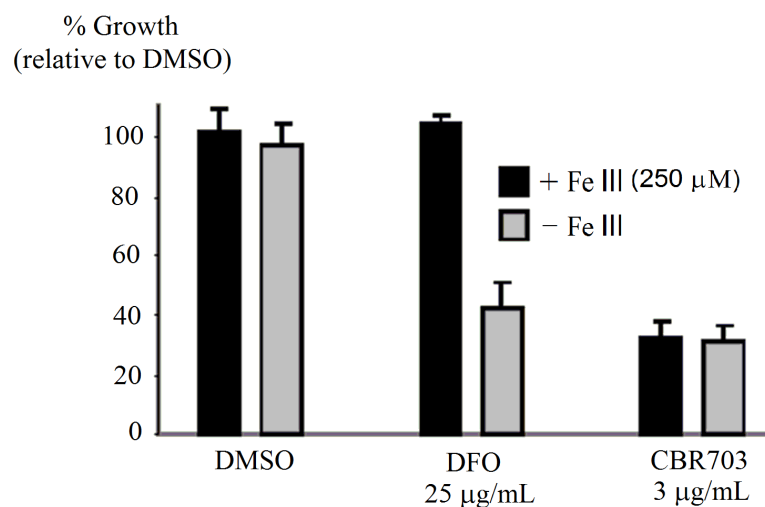

16

1 **FIG. S1** Effect of **CBR703** and deferoxamine mesylate (DFO) on growth of *E. coli TolC* ( $OD_{600}$   
2 determined after 16 h incubation) in presence or absence of Fe III. The antibacterial activity of  
3 DFO was eliminated by addition of Fe III, in contrast, no such effect was observed for **CBR703**.

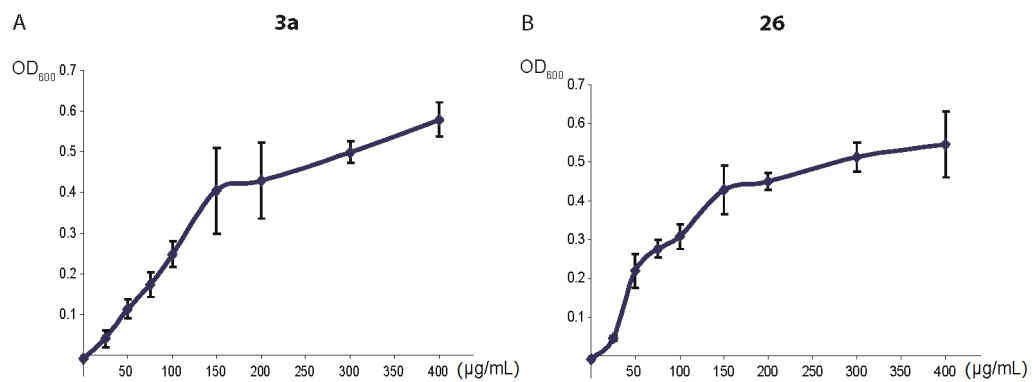

4  
5 **FIG. S2** Concentration dependent precipitation of **3a** and **26** in MHB.

6  
7
